# Supplementary material
Source: publisher figshare collection journal article supplement (https://acs.figshare.com/ndownloader/files/3601392)
Supplement: Supplementary file 1 [file 3601392]

## Sheet: Sheet1
Table S3. Barcoded oligo dT primers.
AGC ACG ACA GAC GCC UGA UUG ACC UUA AGC UCU GGU ACC CUU TTT TTT TTT TTT TTT TV
AGC ACG ACA GAC GCC UGA UUG UGA CAA GAA ACC UUA ACG CUU TTT TTT TTT TTT TTT TV
AGC ACG ACA GAC GCC UGA UUC AUG UGG UGA GUU CGU ACG ACU TTT TTT TTT TTT TTT TV
AGC ACG ACA GAC GCC UGA UUA CUG GUC UCA AGG GAA CAA GUU TTT TTT TTT TTT TTT TV
AGC ACG ACA GAC GCC UGA UUC UGG AAC CUA GGG UAG AAG UCU TTT TTT TTT TTT TTT TV
AGC ACG ACA GAC GCC UGA UUG UUU CAC GUA CCC AAG UCU GGU TTT TTT TTT TTT TTT TV
AGC ACG ACA GAC GCC UGA UUG UUC CAC UUC AGA ACC AGU CGU TTT TTT TTT TTT TTT TV
AGC ACG ACA GAC GCC UGA UUG GUC UGA CUC ACG AAG CUA AAU TTT TTT TTT TTT TTT TV
AGC ACG ACA GAC GCC UGA UUA AAG ACU GAC CAC UCU UCG AGU TTT TTT TTT TTT TTT TV
AGC ACG ACA GAC GCC UGA UUA AAG ACU AUG UCU CCU UGC GAU TTT TTT TTT TTT TTT TV
AGC ACG ACA GAC GCC UGA UUA AAC GUU GCU CUC ACU AGG ACU TTT TTT TTT TTT TTT TV
AGC ACG ACA GAC GCC UGA UUC UGA CAA GGA CAG UAG GUU CCU TTT TTT TTT TTT TTT TV
AGC ACG ACA GAC GCC UGA UUG ACU CGA ACU CGU CUU CUA GUU TTT TTT TTT TTT TTT TV
AGC ACG ACA GAC GCC UGA UUU GAG CUA CGU UGA GUA UGU CCU TTT TTT TTT TTT TTT TV
AGC ACG ACA GAC GCC UGA UUU CAU GUG AGG UUG CAA AUG CCU TTT TTT TTT TTT TTT TV
AGC ACG ACA GAC GCC UGA UUU ACU CGA CAG UGG AUG GGU ACU TTT TTT TTT TTT TTT TV
AGC ACG ACA GAC GCC UGA UUA UGG UCU GUU ACA CAA ACG CUU TTT TTT TTT TTT TTT TV
AGC ACG ACA GAC GCC UGA UUG UGA CUG UCG AAC CAG ACC AUU TTT TTT TTT TTT TTT TV
AGC ACG ACA GAC GCC UGA UUA CCC UAG AGU CGU UGU ACC UCU TTT TTT TTT TTT TTT TV
AGC ACG ACA GAC GCC UGA UUU CAC GAA GCA AGU AGA AGU UCU TTT TTT TTT TTT TTT TV
AGC ACG ACA GAC GCC UGA UUC AGC UAG UUA ACA GAA AGU GCU TTT TTT TTT TTT TTT TV
AGC ACG ACA GAC GCC UGA UUA CUA GCA CUA GAG AGA GGU UCU TTT TTT TTT TTT TTT TV
AGC ACG ACA GAC GCC UGA UUC AGG ACU UUA GGC UUA AAG GCU TTT TTT TTT TTT TTT TV
AGC ACG ACA GAC GCC UGA UUC AAG GAU GUU GAG CUA CCA GAU TTT TTT TTT TTT TTT TV
AGC ACG ACA GAC GCC UGA UUG ACA CUU CUC CAU GGA GUC CUU TTT TTT TTT TTT TTT TV
AGC ACG ACA GAC GCC UGA UUG GAA GCU UCC AGA AAG GGU UCU TTT TTT TTT TTT TTT TV
AGC ACG ACA GAC GCC UGA UUG UCC ACU ACU AGG AAG CGA AUU TTT TTT TTT TTT TTT TV
AGC ACG ACA GAC GCC UGA UUA GAA ACU AGG UCU UCG UAC GGU TTT TTT TTT TTT TTT TV
AGC ACG ACA GAC GCC UGA UUA AAC AGU GAC UCU CUU CGU GAU TTT TTT TTT TTT TTT TV
AGC ACG ACA GAC GCC UGA UUC GCA ACU CGA GUU UAU GUU UCU TTT TTT TTT TTT TTT TV
AGC ACG ACA GAC GCC UGA UUU AGC AAC ACU CAC GUA ACU GGU TTT TTT TTT TTT TTT TV
AGC ACG ACA GAC GCC UGA UUU CUG AAA CAG GAG UCA CGA GUU TTT TTT TTT TTT TTT TV
AGC ACG ACA GAC GCC UGA UUU UUC AGG AGU CUC UUC AAC CGU TTT TTT TTT TTT TTT TV
AGC ACG ACA GAC GCC UGA UUU UUC GAU GUG ACC AGA GCA AUU TTT TTT TTT TTT TTT TV
AGC ACG ACA GAC GCC UGA UUU AAC ACG UAG CAC AAG UCC UGU TTT TTT TTT TTT TTT TV
AGC ACG ACA GAC GCC UGA UUG GCA UGG UUG ACA CAC GAA AUU TTT TTT TTT TTT TTT TV
AGC ACG ACA GAC GCC UGA UUC AAU GUU GUU AAG CCU UCA CGU TTT TTT TTT TTT TTT TV
AGC ACG ACA GAC GCC UGA UUA CAG CUU CGU AGU UGU GUU CAU TTT TTT TTT TTT TTT TV
AGC ACG ACA GAC GCC UGA UUU CGA CUA GUA ACA ACG GAA GUU TTT TTT TTT TTT TTT TV
AGC ACG ACA GAC GCC UGA UUA CCC UAG GAA GCU UGU ACU CCU TTT TTT TTT TTT TTT TV
AGC ACG ACA GAC GCC UGA UUA CGU AAA GAG CAG UUU AGC ACU TTT TTT TTT TTT TTT TV
AGC ACG ACA GAC GCC UGA UUU CCA AAG GAG AUG CAG UUU CUU TTT TTT TTT TTT TTT TV
AGC ACG ACA GAC GCC UGA UUC AGG UGA GUG GAA CUU AGU CCU TTT TTT TTT TTT TTT TV
AGC ACG ACA GAC GCC UGA UUU CUC GAG UGA ACC AGA CAA CUU TTT TTT TTT TTT TTT TV
AGC ACG ACA GAC GCC UGA UUC UUC GAA GCA AAC UUA GAA CGU TTT TTT TTT TTT TTT TV
AGC ACG ACA GAC GCC UGA UUG CUU GGA UGC ACA ACC UUU AGU TTT TTT TTT TTT TTT TV
AGC ACG ACA GAC GCC UGA UUA AAU GAC AUG UCG UGA AGC CUU TTT TTT TTT TTT TTT TV
AGC ACG ACA GAC GCC UGA UUA CUU GUG UAG GAA CCU AGC AGU TTT TTT TTT TTT TTT TV
AGC ACG ACA GAC GCC UGA UUA CCU GUG GUG UAG CUA CUG AUU TTT TTT TTT TTT TTT TV
AGC ACG ACA GAC GCC UGA UUC AAU GUA GUG AGC UUG CAG UCU TTT TTT TTT TTT TTT TV
AGC ACG ACA GAC GCC UGA UUC UAU GCU CUU AGA GGA GUA GCU TTT TTT TTT TTT TTT TV
AGC ACG ACA GAC GCC UGA UUG GUU UAC ACC UUA GCG UUC CAU TTT TTT TTT TTT TTT TV
AGC ACG ACA GAC GCC UGA UUU GGC AAG CCA AGG UUA GUU UCU TTT TTT TTT TTT TTT TV
AGC ACG ACA GAC GCC UGA UUU GGC AAC ACA AGG UCU AAU GGU TTT TTT TTT TTT TTT TV
AGC ACG ACA GAC GCC UGA UUU GGA ACA CCU ACU GUC AGA CCU TTT TTT TTT TTT TTT TV
AGC ACG ACA GAC GCC UGA UUU AUG UAC CAA GGC UUG CGA AAU TTT TTT TTT TTT TTT TV
AGC ACG ACA GAC GCC UGA UUC CGU AGU GGU AGG CUA GAA ACU TTT TTT TTT TTT TTT TV
AGC ACG ACA GAC GCC UGA UUC ACA GCU UCC GUU AGG UCU AUU TTT TTT TTT TTT TTT TV
AGC ACG ACA GAC GCC UGA UUC AAA GAU GCA UGG AUG ACU CCU TTT TTT TTT TTT TTT TV
AGC ACG ACA GAC GCC UGA UUG UUU AAC CCA AGC UAG UAC GGU TTT TTT TTT TTT TTT TV
AGC ACG ACA GAC GCC UGA UUA AAG UCA GAA GGC UAG CCU UUU TTT TTT TTT TTT TTT TV
AGC ACG ACA GAC GCC UGA UUA AAC UUG UAG UGC AGA GCU CUU TTT TTT TTT TTT TTT TV
AGC ACG ACA GAC GCC UGA UUG ACC UUU ACU ACC GUU AGC UGU TTT TTT TTT TTT TTT TV
AGC ACG ACA GAC GCC UGA UUG UCA CUU UGA AAC GGA AAG CUU TTT TTT TTT TTT TTT TV
AGC ACG ACA GAC GCC UGA UUU UUG UCA CUG GAA GCA UGG ACU TTT TTT TTT TTT TTT TV
AGC ACG ACA GAC GCC UGA UUU UAC GAG UAG AGC AAA GCU ACU TTT TTT TTT TTT TTT TV
AGC ACG ACA GAC GCC UGA UUG CUC UAC UCC UUA GUU CGA AGU TTT TTT TTT TTT TTT TV
AGC ACG ACA GAC GCC UGA UUA GUC UCU CCU CUA GGA CUG AAU TTT TTT TTT TTT TTT TV
AGC ACG ACA GAC GCC UGA UUA CGU UGG GUA AGA CAG ACC UAU TTT TTT TTT TTT TTT TV
AGC ACG ACA GAC GCC UGA UUG UUA GCA GAA CUU UCC UCA CGU TTT TTT TTT TTT TTT TV
AGC ACG ACA GAC GCC UGA UUC UUA GAG AGC AAG UUG CCA ACU TTT TTT TTT TTT TTT TV
AGC ACG ACA GAC GCC UGA UUU CUA GCU CUG AGA GAG AUG UCU TTT TTT TTT TTT TTT TV
AGC ACG ACA GAC GCC UGA UUG UCC UGA UGA GAC AUG CGA AAU TTT TTT TTT TTT TTT TV
AGC ACG ACA GAC GCC UGA UUC UUU CAG UAC CAA GGA AGG CUU TTT TTT TTT TTT TTT TV
AGC ACG ACA GAC GCC UGA UUU UUA CAG UAC GCA AGG CAA GUU TTT TTT TTT TTT TTT TV
AGC ACG ACA GAC GCC UGA UUA CGU CUC UAC CGU ACA AAG UGU TTT TTT TTT TTT TTT TV
AGC ACG ACA GAC GCC UGA UUC AAG CUU CGG UUG AUG GAA ACU TTT TTT TTT TTT TTT TV
AGC ACG ACA GAC GCC UGA UUC AGG UUC CAG UUU GGU AAU GCU TTT TTT TTT TTT TTT TV
AGC ACG ACA GAC GCC UGA UUU CAA ACG AAC AAG UUG UAC GGU TTT TTT TTT TTT TTT TV
AGC ACG ACA GAC GCC UGA UUC AAA UGG UGU GCU ACU AGC UGU TTT TTT TTT TTT TTT TV
AGC ACG ACA GAC GCC UGA UUC ACA AUG AUG CUU UCG UGA GGU TTT TTT TTT TTT TTT TV
AGC ACG ACA GAC GCC UGA UUG UCG AGA UGA CCU CAC UUU GUU TTT TTT TTT TTT TTT TV
AGC ACG ACA GAC GCC UGA UUC GAG UCC UAC AAG AAG GUU UCU TTT TTT TTT TTT TTT TV
AGC ACG ACA GAC GCC UGA UUA AAC UGA CAG AGC UUA GGC UUU TTT TTT TTT TTT TTT TV
AGC ACG ACA GAC GCC UGA UUC UUU CGA CAU GAA GGG AAC GUU TTT TTT TTT TTT TTT TV
AGC ACG ACA GAC GCC UGA UUA AUG CUU GGU GUC AGU GCU ACU TTT TTT TTT TTT TTT TV
AGC ACG ACA GAC GCC UGA UUG ACG UAG GCU UGG AGU CAA ACU TTT TTT TTT TTT TTT TV
AGC ACG ACA GAC GCC UGA UUC UUU AAG GCU UCA CCA ACG GUU TTT TTT TTT TTT TTT TV
AGC ACG ACA GAC GCC UGA UUC UGU UCA CUG AAG GUG UAG GCU TTT TTT TTT TTT TTT TV
AGC ACG ACA GAC GCC UGA UUG UUU ACU AAC UGC UUG AGC UGU TTT TTT TTT TTT TTT TV
AGC ACG ACA GAC GCC UGA UUG UAA ACC UAC AUG CUU GCG UAU TTT TTT TTT TTT TTT TV
AGC ACG ACA GAC GCC UGA UUU GAA ACA ACU AAC GAC UCG UGU TTT TTT TTT TTT TTT TV
AGC ACG ACA GAC GCC UGA UUC AGG UUA GUA GGU CUU CCG AAU TTT TTT TTT TTT TTT TV
AGC ACG ACA GAC GCC UGA UUA UGU UCC UUU CGU AGA GAC CUU TTT TTT TTT TTT TTT TV
AGC ACG ACA GAC GCC UGA UUU UUG ACA CAG ACG UCU AGC ACU TTT TTT TTT TTT TTT TV
AGC ACG ACA GAC GCC UGA UUC UAG GAG AGA AGU CCA CUG GUU TTT TTT TTT TTT TTT TV
AGC ACG ACA GAC GCC UGA UUG GGA ACU ACG UCU CCU ACA UGU TTT TTT TTT TTT TTT TV
AGC ACG ACA GAC GCC UGA UUU CAA GCC UAA CCA GAG AGU UCU TTT TTT TTT TTT TTT TV
AGC ACG ACA GAC GCC UGA UUU GUC AGA CGA UGU GGA UGU CCU TTT TTT TTT TTT TTT TV
AGC ACG ACA GAC GCC UGA UUU GUU AGC UGA ACC CAA CAA GUU TTT TTT TTT TTT TTT TV
AGC ACG ACA GAC GCC UGA UUU UUG ACA UGA CAG GAC ACG UGU TTT TTT TTT TTT TTT TV
AGC ACG ACA GAC GCC UGA UUA AAG CUA ACG UUG GUU UCC GAU TTT TTT TTT TTT TTT TV
AGC ACG ACA GAC GCC UGA UUU CCG AAC AGG UAC CUA AGU CCU TTT TTT TTT TTT TTT TV
AGC ACG ACA GAC GCC UGA UUC UCG UCA CAG GUU GUU AAG UCU TTT TTT TTT TTT TTT TV
AGC ACG ACA GAC GCC UGA UUA CCG UUC GUC UGC AUG UUA ACU TTT TTT TTT TTT TTT TV
AGC ACG ACA GAC GCC UGA UUA AAC UGA CAA GAG UUG UAC GCU TTT TTT TTT TTT TTT TV
AGC ACG ACA GAC GCC UGA UUC CAC UGC UCA GAA GGU GUU ACU TTT TTT TTT TTT TTT TV
AGC ACG ACA GAC GCC UGA UUA CUG UUC CUG AGA GGU AGG UCU TTT TTT TTT TTT TTT TV
AGC ACG ACA GAC GCC UGA UUA UGC UCU UCC UAA GGU CAG GUU TTT TTT TTT TTT TTT TV
AGC ACG ACA GAC GCC UGA UUC GCU AAC UGA GAC AAA CUU UGU TTT TTT TTT TTT TTT TV
AGC ACG ACA GAC GCC UGA UUU CUA CAG GAA CAA UGC UAC CGU TTT TTT TTT TTT TTT TV
AGC ACG ACA GAC GCC UGA UUA GCU GUC UAG AAC AAA CCU AGU TTT TTT TTT TTT TTT TV
AGC ACG ACA GAC GCC UGA UUC UUU CGA UGG AAC GUA GAG ACU TTT TTT TTT TTT TTT TV
AGC ACG ACA GAC GCC UGA UUG CUG UAC UCA AGA ACG AAG GUU TTT TTT TTT TTT TTT TV
AGC ACG ACA GAC GCC UGA UUG CAG UCA CAU GAG GAG UGU UCU TTT TTT TTT TTT TTT TV
AGC ACG ACA GAC GCC UGA UUA CUG UCU UUG UUA CCA AGC GUU TTT TTT TTT TTT TTT TV
AGC ACG ACA GAC GCC UGA UUA ACC GUA GUA CUA CUC UAG GGU TTT TTT TTT TTT TTT TV
AGC ACG ACA GAC GCC UGA UUU GUU UCA GUC ACU ACC UCA GGU TTT TTT TTT TTT TTT TV
AGC ACG ACA GAC GCC UGA UUU GAA ACA ACC AAG UUC GUA GCU TTT TTT TTT TTT TTT TV
AGC ACG ACA GAC GCC UGA UUU GAA CAC AAC CUA GGA CUU GCU TTT TTT TTT TTT TTT TV
AGC ACG ACA GAC GCC UGA UUG UAC CCU UCC UUG ACA UGG AGU TTT TTT TTT TTT TTT TV
AGC ACG ACA GAC GCC UGA UUA ACU UGU ACU UCG UGU UCG GAU TTT TTT TTT TTT TTT TV
AGC ACG ACA GAC GCC UGA UUU AAG CCA ACA AUG UCA ACG UGU TTT TTT TTT TTT TTT TV
AGC ACG ACA GAC GCC UGA UUG GUG UAC UAC GUU CCU AGA GGU TTT TTT TTT TTT TTT TV
AGC ACG ACA GAC GCC UGA UUU CGA UGA ACU GUG GUG UCC UAU TTT TTT TTT TTT TTT TV
AGC ACG ACA GAC GCC UGA UUU UUG AGC UAA CCG AAC GAC AUU TTT TTT TTT TTT TTT TV
AGC ACG ACA GAC GCC UGA UUU UUG AGC UAG ACA CAA CCG AUU TTT TTT TTT TTT TTT TV
AGC ACG ACA GAC GCC UGA UUG CAA GGU ACG UUU CGU UCU UAU TTT TTT TTT TTT TTT TV
AGC ACG ACA GAC GCC UGA UUU UUG ACU AAC GGU UCU UGC GAU TTT TTT TTT TTT TTT TV
AGC ACG ACA GAC GCC UGA UUA AAC CUG UGG AGA CGU GUG ACU TTT TTT TTT TTT TTT TV
AGC ACG ACA GAC GCC UGA UUA CCC UAG AAC GAU GUA AGC UCU TTT TTT TTT TTT TTT TV
AGC ACG ACA GAC GCC UGA UUA CCU CUG UCA AGG AGA AGG UCU TTT TTT TTT TTT TTT TV
AGC ACG ACA GAC GCC UGA UUC AGU AAA GAG AGC UAA GCC UUU TTT TTT TTT TTT TTT TV
AGC ACG ACA GAC GCC UGA UUU GUG GAC ACC UCU GUU ACG ACU TTT TTT TTT TTT TTT TV
AGC ACG ACA GAC GCC UGA UUG AAC CUA CCA CUU GCA GUA GUU TTT TTT TTT TTT TTT TV
AGC ACG ACA GAC GCC UGA UUC CCA UGG UAC UGG UUC CGA AAU TTT TTT TTT TTT TTT TV
AGC ACG ACA GAC GCC UGA UUU ACA AGG AAG UUG CUU CUC GAU TTT TTT TTT TTT TTT TV
AGC ACG ACA GAC GCC UGA UUU CAA CAG UAC GGA AGU CUC CAU TTT TTT TTT TTT TTT TV
AGC ACG ACA GAC GCC UGA UUU GAA GAC UAC GAA ACG CAU GUU TTT TTT TTT TTT TTT TV
AGC ACG ACA GAC GCC UGA UUC UUU CGA AAG AGC UGA GGU UCU TTT TTT TTT TTT TTT TV
AGC ACG ACA GAC GCC UGA UUA CUC UCG AAC AGC UUA AGG ACU TTT TTT TTT TTT TTT TV
AGC ACG ACA GAC GCC UGA UUG GUC ACA CAA GAG UUU CGA GAU TTT TTT TTT TTT TTT TV
AGC ACG ACA GAC GCC UGA UUA GCU CUU AGU UCC UCU AAU GGU TTT TTT TTT TTT TTT TV
AGC ACG ACA GAC GCC UGA UUA GUU CCU GAC UCA CUC UAG GGU TTT TTT TTT TTT TTT TV
AGC ACG ACA GAC GCC UGA UUA ACC GUU GCU CUU AUG GUU CAU TTT TTT TTT TTT TTT TV
AGC ACG ACA GAC GCC UGA UUU CAA CGA CUA AGG GAA GGU UCU TTT TTT TTT TTT TTT TV
AGC ACG ACA GAC GCC UGA UUU CGG AAA GGG UUA CUG ACC ACU TTT TTT TTT TTT TTT TV
AGC ACG ACA GAC GCC UGA UUC UAG UAG GAG ACG UAC AUG CUU TTT TTT TTT TTT TTT TV
AGC ACG ACA GAC GCC UGA UUG UUC GAA CGU AGG UGA AGU CCU TTT TTT TTT TTT TTT TV
AGC ACG ACA GAC GCC UGA UUC CAU GGA CAA GGU AAA GUU CGU TTT TTT TTT TTT TTT TV
AGC ACG ACA GAC GCC UGA UUC AUG UGU UGC GUA AGA ACC UGU TTT TTT TTT TTT TTT TV
AGC ACG ACA GAC GCC UGA UUU GAG UCA GCU ACC CUA ACA AGU TTT TTT TTT TTT TTT TV
AGC ACG ACA GAC GCC UGA UUA ACA GGU AGU CUC UUC UCC AGU TTT TTT TTT TTT TTT TV
AGC ACG ACA GAC GCC UGA UUU CAG GAC UGA CCA AAC CUU AGU TTT TTT TTT TTT TTT TV
AGC ACG ACA GAC GCC UGA UUC UUU CAG AAA GGC UAG UGU GCU TTT TTT TTT TTT TTT TV
AGC ACG ACA GAC GCC UGA UUG UAC CAA ACU CUC GUC AGG ACU TTT TTT TTT TTT TTT TV
AGC ACG ACA GAC GCC UGA UUG UCA ACC AGA GAC UCU UGG GAU TTT TTT TTT TTT TTT TV
AGC ACG ACA GAC GCC UGA UUC AAG AAU GAA UGC UGA AUG CCU TTT TTT TTT TTT TTT TV
AGC ACG ACA GAC GCC UGA UUG CAG UUG CUU GGU AGU CAA ACU TTT TTT TTT TTT TTT TV
AGC ACG ACA GAC GCC UGA UUC GUC UCA CAC UUA GCU UAA GGU TTT TTT TTT TTT TTT TV
AGC ACG ACA GAC GCC UGA UUG CAC UUC AAA CUA GCU GUA AGU TTT TTT TTT TTT TTT TV
AGC ACG ACA GAC GCC UGA UUU GCC AAA CUC UAA GAG ACU AGU TTT TTT TTT TTT TTT TV
AGC ACG ACA GAC GCC UGA UUA CGU GUU CUC CUA GAG CUU UAU TTT TTT TTT TTT TTT TV
AGC ACG ACA GAC GCC UGA UUG UCG UUA GUC ACU ACU ACG CUU TTT TTT TTT TTT TTT TV
AGC ACG ACA GAC GCC UGA UUC UAG AAG GAA GCG UUU ACG UCU TTT TTT TTT TTT TTT TV
AGC ACG ACA GAC GCC UGA UUC UAG GAA AGG GUA CUA CAG CUU TTT TTT TTT TTT TTT TV
AGC ACG ACA GAC GCC UGA UUC UUC UAG GUA UGC UGU ACG AGU TTT TTT TTT TTT TTT TV
AGC ACG ACA GAC GCC UGA UUC UUU CAG UUG CUA UGU AGC GAU TTT TTT TTT TTT TTT TV
AGC ACG ACA GAC GCC UGA UUU GUA CUA CAC ACG UUG CCA AGU TTT TTT TTT TTT TTT TV
AGC ACG ACA GAC GCC UGA UUU UUA GCA CAA GCG UAA CAG GUU TTT TTT TTT TTT TTT TV
AGC ACG ACA GAC GCC UGA UUC GGU AAA GUU ACA ACC AAG CUU TTT TTT TTT TTT TTT TV
AGC ACG ACA GAC GCC UGA UUC AAG GUU GUU GCU AAG GUC UCU TTT TTT TTT TTT TTT TV
AGC ACG ACA GAC GCC UGA UUG AAA CCU AGC ACU CUU CGG UAU TTT TTT TTT TTT TTT TV
AGC ACG ACA GAC GCC UGA UUG GGU AGC AAC GGU ACU AUG UCU TTT TTT TTT TTT TTT TV
AGC ACG ACA GAC GCC UGA UUA GGU UGC UUC GUU ACU AGA CCU TTT TTT TTT TTT TTT TV
AGC ACG ACA GAC GCC UGA UUG GCA AUG ACC UUU GUU GCU UAU TTT TTT TTT TTT TTT TV
AGC ACG ACA GAC GCC UGA UUA GGU UCU GAC UUC UCA CUC AGU TTT TTT TTT TTT TTT TV
AGC ACG ACA GAC GCC UGA UUA GGU UCU UGU UUC ACU CGA AGU TTT TTT TTT TTT TTT TV
AGC ACG ACA GAC GCC UGA UUU AUG ACA GAA CCA UGA ACG CUU TTT TTT TTT TTT TTT TV
AGC ACG ACA GAC GCC UGA UUU UAG ACG AAA GCC UAG ACC UCU TTT TTT TTT TTT TTT TV
AGC ACG ACA GAC GCC UGA UUG UAA CGA CAC GAC UAA UGG CUU TTT TTT TTT TTT TTT TV
AGC ACG ACA GAC GCC UGA UUG GCU UCA ACC UAC GUA AGA CCU TTT TTT TTT TTT TTT TV
AGC ACG ACA GAC GCC UGA UUG GUU CUA AGU UCG CUA AGC UCU TTT TTT TTT TTT TTT TV
AGC ACG ACA GAC GCC UGA UUG AAC UCA ACC CUA GGG UUC CAU TTT TTT TTT TTT TTT TV
AGC ACG ACA GAC GCC UGA UUG AAA CGU CUG CUC AAG UGU UCU TTT TTT TTT TTT TTT TV
AGC ACG ACA GAC GCC UGA UUU AGA GUC AUG CUU UCC UUC GAU TTT TTT TTT TTT TTT TV
AGC ACG ACA GAC GCC UGA UUC UGA GUA GCA CUC UCA CUA AGU TTT TTT TTT TTT TTT TV
AGC ACG ACA GAC GCC UGA UUC UGU GAA GCA CUU CAA CAA GUU TTT TTT TTT TTT TTT TV
AGC ACG ACA GAC GCC UGA UUC AUG GAG AAC AGU GUU AGC ACU TTT TTT TTT TTT TTT TV
AGC ACG ACA GAC GCC UGA UUC ACG AUG UUC AGG UCU AAG GGU TTT TTT TTT TTT TTT TV
AGC ACG ACA GAC GCC UGA UUC GAC UAG GUC UAC CCU UUA AGU TTT TTT TTT TTT TTT TV
AGC ACG ACA GAC GCC UGA UUU AAG AAC GAC AGG UCU AUG CCU TTT TTT TTT TTT TTT TV
AGC ACG ACA GAC GCC UGA UUG GUU ACU ACC CUA GAA ACG CUU TTT TTT TTT TTT TTT TV
AGC ACG ACA GAC GCC UGA UUA CAA CGU CUU GGA AAG UUU GCU TTT TTT TTT TTT TTT TV
AGC ACG ACA GAC GCC UGA UUG GUU CGA AAG CAG UUA CCA GAU TTT TTT TTT TTT TTT TV
AGC ACG ACA GAC GCC UGA UUG ACU AGU ACU UGC UCU CCU GAU TTT TTT TTT TTT TTT TV
AGC ACG ACA GAC GCC UGA UUG AAG CGU UAA CGA CAC AAU GUU TTT TTT TTT TTT TTT TV
AGC ACG ACA GAC GCC UGA UUA CGG UUA UGC CUA AGU ACC UCU TTT TTT TTT TTT TTT TV
AGC ACG ACA GAC GCC UGA UUG GUC AGU UUG CCA AAC CGU UUU TTT TTT TTT TTT TTT TV
AGC ACG ACA GAC GCC UGA UUG GAC AGU ACC CUU GCC UUA UGU TTT TTT TTT TTT TTT TV
AGC ACG ACA GAC GCC UGA UUG GAC ACU ACU CCU GUC GUC AUU TTT TTT TTT TTT TTT TV
AGC ACG ACA GAC GCC UGA UUA GUC CUG UAA ACG CAA AGG UCU TTT TTT TTT TTT TTT TV
AGC ACG ACA GAC GCC UGA UUA GUG CUG UGU UGA CUC UAG ACU TTT TTT TTT TTT TTT TV
AGC ACG ACA GAC GCC UGA UUG GAC AGU CUG GUU AAG CUC UCU TTT TTT TTT TTT TTT TV
AGC ACG ACA GAC GCC UGA UUA GCC UAA UGU GCA GUA UGG UCU TTT TTT TTT TTT TTT TV
AGC ACG ACA GAC GCC UGA UUG ACC ACU AUG ACG UAG UUG GCU TTT TTT TTT TTT TTT TV
AGC ACG ACA GAC GCC UGA UUA UGG UCU UGG UAC GUU CGA CAU TTT TTT TTT TTT TTT TV
AGC ACG ACA GAC GCC UGA UUU GAG UAC GAA CUU CCU ACA CGU TTT TTT TTT TTT TTT TV
AGC ACG ACA GAC GCC UGA UUC ACC AUG AAG GCU UAC GGU UUU TTT TTT TTT TTT TTT TV
AGC ACG ACA GAC GCC UGA UUA ACA UGA ACU UGC GUU UCC GAU TTT TTT TTT TTT TTT TV
AGC ACG ACA GAC GCC UGA UUA CUG UGC UUU CUA GUU ACC GAU TTT TTT TTT TTT TTT TV
AGC ACG ACA GAC GCC UGA UUU GGA CUU UAG CCU ACU UCG ACU TTT TTT TTT TTT TTT TV
AGC ACG ACA GAC GCC UGA UUA UGA CGA CAA GGU ACU ACC GUU TTT TTT TTT TTT TTT TV
AGC ACG ACA GAC GCC UGA UUA CAG GAU GCA ACU UCC AAA UGU TTT TTT TTT TTT TTT TV
AGC ACG ACA GAC GCC UGA UUG UGG ACU UGA CCA ACA CUU CGU TTT TTT TTT TTT TTT TV
AGC ACG ACA GAC GCC UGA UUG CGA ACU AGU CCU UUC CUU GAU TTT TTT TTT TTT TTT TV
AGC ACG ACA GAC GCC UGA UUA GUC CUA CGU UGU AAG UUU CGU TTT TTT TTT TTT TTT TV
AGC ACG ACA GAC GCC UGA UUA AAG UUC AGA CUA AGC AUG CCU TTT TTT TTT TTT TTT TV
AGC ACG ACA GAC GCC UGA UUA AAG CUA CAU GGG AAC GGU UCU TTT TTT TTT TTT TTT TV
AGC ACG ACA GAC GCC UGA UUU UCG AGA GAA CAC UUU AUG CCU TTT TTT TTT TTT TTT TV
AGC ACG ACA GAC GCC UGA UUA UGU CCU CUU UAA GGG UAG CCU TTT TTT TTT TTT TTT TV
AGC ACG ACA GAC GCC UGA UUU UAC GAA CCG AAG UCU AGG ACU TTT TTT TTT TTT TTT TV
AGC ACG ACA GAC GCC UGA UUA GUC GUG UUG UAC AAG GUU CCU TTT TTT TTT TTT TTT TV
AGC ACG ACA GAC GCC UGA UUA GUC UCU GUC UCU ACA ACG UGU TTT TTT TTT TTT TTT TV
AGC ACG ACA GAC GCC UGA UUG AAA CCU ACC UUG UGC UUG GAU TTT TTT TTT TTT TTT TV
AGC ACG ACA GAC GCC UGA UUU CGA CAA CAA CUA GUA UGG CUU TTT TTT TTT TTT TTT TV
AGC ACG ACA GAC GCC UGA UUA GUC CUU CAC UAU GGU ACU CGU TTT TTT TTT TTT TTT TV
AGC ACG ACA GAC GCC UGA UUA GUC UCU ACC CUU GGC AAA UGU TTT TTT TTT TTT TTT TV
AGC ACG ACA GAC GCC UGA UUA AAG CUU UAC GGA AAC AGU CGU TTT TTT TTT TTT TTT TV
AGC ACG ACA GAC GCC UGA UUA AGC UUG AUG UCU CGU ACU CCU TTT TTT TTT TTT TTT TV
AGC ACG ACA GAC GCC UGA UUG ACG UUA CUC CAG ACA GUC CAU TTT TTT TTT TTT TTT TV
AGC ACG ACA GAC GCC UGA UUC GAC ACU AAA CCU GUA ACG GUU TTT TTT TTT TTT TTT TV
AGC ACG ACA GAC GCC UGA UUA GCA GUU CGU ACU CUU UGU CAU TTT TTT TTT TTT TTT TV
AGC ACG ACA GAC GCC UGA UUA GCG UAC UUU GUC ACU UGU GAU TTT TTT TTT TTT TTT TV
AGC ACG ACA GAC GCC UGA UUA GAG CUA GCA ACU CUU UAC AGU TTT TTT TTT TTT TTT TV
AGC ACG ACA GAC GCC UGA UUG UCG ACU UCA CAG UGU UCC CAU TTT TTT TTT TTT TTT TV
AGC ACG ACA GAC GCC UGA UUG UCC AGU UGA CCA AAC GCA AUU TTT TTT TTT TTT TTT TV
AGC ACG ACA GAC GCC UGA UUG UGG ACU AAC CUG AAC CUU CGU TTT TTT TTT TTT TTT TV
AGC ACG ACA GAC GCC UGA UUG GCU AAA GGU UAA CAC AGC AUU TTT TTT TTT TTT TTT TV
AGC ACG ACA GAC GCC UGA UUC GAA CCU AGU ACU ACA AGU GGU TTT TTT TTT TTT TTT TV
AGC ACG ACA GAC GCC UGA UUA CAA CGU GAA ACC UCU AUG GGU TTT TTT TTT TTT TTT TV
AGC ACG ACA GAC GCC UGA UUA UGC GUU GAA CUC UUU CCU AGU TTT TTT TTT TTT TTT TV
AGC ACG ACA GAC GCC UGA UUA CCU GUA GAC CUU UCU UCG GAU TTT TTT TTT TTT TTT TV
AGC ACG ACA GAC GCC UGA UUA GCA GUU CUU AAG GGU UUC CAU TTT TTT TTT TTT TTT TV
AGC ACG ACA GAC GCC UGA UUC CUG AGU CAA GGU UAU GUU GCU TTT TTT TTT TTT TTT TV
AGC ACG ACA GAC GCC UGA UUC UGC UAA AGU CUG UGG UUC UAU TTT TTT TTT TTT TTT TV
AGC ACG ACA GAC GCC UGA UUU UUC GUA CGA ACC UCU UGU GAU TTT TTT TTT TTT TTT TV
AGC ACG ACA GAC GCC UGA UUU UUC GUA CUG GAG ACA AAG CUU TTT TTT TTT TTT TTT TV
AGC ACG ACA GAC GCC UGA UUG GUU UAC UGA ACA CCU UCC GAU TTT TTT TTT TTT TTT TV
AGC ACG ACA GAC GCC UGA UUA GUC GUU UCU UGG AAU GCA CUU TTT TTT TTT TTT TTT TV
AGC ACG ACA GAC GCC UGA UUA ACG AGU UCG AUG GUU ACG UCU TTT TTT TTT TTT TTT TV
AGC ACG ACA GAC GCC UGA UUU AAG CAA AGA ACG UUC UAC GGU TTT TTT TTT TTT TTT TV
AGC ACG ACA GAC GCC UGA UUG GUU CUA GAA CCC UUG AGC UCU TTT TTT TTT TTT TTT TV
AGC ACG ACA GAC GCC UGA UUG GCU UUA CUC GUA ACU ACC GAU TTT TTT TTT TTT TTT TV
AGC ACG ACA GAC GCC UGA UUG GAG UCC AAG AGC UAG UUG UCU TTT TTT TTT TTT TTT TV
AGC ACG ACA GAC GCC UGA UUA GGU CUA AGU GUC CUU CGU CAU TTT TTT TTT TTT TTT TV
AGC ACG ACA GAC GCC UGA UUA UGG CUU CAA AUG UUC UAC GGU TTT TTT TTT TTT TTT TV
AGC ACG ACA GAC GCC UGA UUG ACG UUA CCA UGU UCG AGU GGU TTT TTT TTT TTT TTT TV
AGC ACG ACA GAC GCC UGA UUC CUG AAA UGG UUA CGG UUC GAU TTT TTT TTT TTT TTT TV
AGC ACG ACA GAC GCC UGA UUA GUG CAU GUU CCA ACC ACU AGU TTT TTT TTT TTT TTT TV
AGC ACG ACA GAC GCC UGA UUU UUC CGA UGG ACA GUA AGC ACU TTT TTT TTT TTT TTT TV
AGC ACG ACA GAC GCC UGA UUC UUG AAA GAG AUG CAG ACU CAU TTT TTT TTT TTT TTT TV
AGC ACG ACA GAC GCC UGA UUC GGU AAG ACG UCU UUG UCC UAU TTT TTT TTT TTT TTT TV
AGC ACG ACA GAC GCC UGA UUA GGU CUU CCC UUA GCC UAU GAU TTT TTT TTT TTT TTT TV
AGC ACG ACA GAC GCC UGA UUG ACC ACU GGA CUU UAC CUC UGU TTT TTT TTT TTT TTT TV
AGC ACG ACA GAC GCC UGA UUA CAU GCA ACG UUG UAG UGG UCU TTT TTT TTT TTT TTT TV
AGC ACG ACA GAC GCC UGA UUC CUA ACG AUG CUU GUG GUC UAU TTT TTT TTT TTT TTT TV
AGC ACG ACA GAC GCC UGA UUU ACC GAA CUU AGG UGA GUG ACU TTT TTT TTT TTT TTT TV
AGC ACG ACA GAC GCC UGA UUA CUC GUG UGG UAC UUG AAA GCU TTT TTT TTT TTT TTT TV
AGC ACG ACA GAC GCC UGA UUU CGA ACC CUA GAG GAU GUG ACU TTT TTT TTT TTT TTT TV
AGC ACG ACA GAC GCC UGA UUC GUC AGA CCA AAU GAA CGU UUU TTT TTT TTT TTT TTT TV
AGC ACG ACA GAC GCC UGA UUU UUC ACG UUC CGA AUG GAC AGU TTT TTT TTT TTT TTT TV
AGC ACG ACA GAC GCC UGA UUA CCC UUG CUG AAG AAA GAA CUU TTT TTT TTT TTT TTT TV
AGC ACG ACA GAC GCC UGA UUA CGG UUC UAA CGA CAG GAC UAU TTT TTT TTT TTT TTT TV
AGC ACG ACA GAC GCC UGA UUC ACG UUU CUA AGG GAU GUA CGU TTT TTT TTT TTT TTT TV
AGC ACG ACA GAC GCC UGA UUC AAA UGU AAA GUG CUG AAC CGU TTT TTT TTT TTT TTT TV
AGC ACG ACA GAC GCC UGA UUG UAG GAC AAC GAG UUU ACG CAU TTT TTT TTT TTT TTT TV
AGC ACG ACA GAC GCC UGA UUU AAG CGA AAC AGG UUU ACC GAU TTT TTT TTT TTT TTT TV
AGC ACG ACA GAC GCC UGA UUA AAU GUC ACC UGU GCU UGC ACU TTT TTT TTT TTT TTT TV
AGC ACG ACA GAC GCC UGA UUC AGA GUU ACU CGU CUG UAC CCU TTT TTT TTT TTT TTT TV
AGC ACG ACA GAC GCC UGA UUC ACG AGU AGA ACU ACU AGG GUU TTT TTT TTT TTT TTT TV
AGC ACG ACA GAC GCC UGA UUA CUG UCC UAC GGA AGG GUU ACU TTT TTT TTT TTT TTT TV
AGC ACG ACA GAC GCC UGA UUC GGU UGA CCA GAG UGA CUA AAU TTT TTT TTT TTT TTT TV
AGC ACG ACA GAC GCC UGA UUC CGU UAC CAG AGG UUG UGU ACU TTT TTT TTT TTT TTT TV
AGC ACG ACA GAC GCC UGA UUG CAC UCC UAC CUG AAC UUG UGU TTT TTT TTT TTT TTT TV
AGC ACG ACA GAC GCC UGA UUU GGA AGC GUA AAC ACC UUU AGU TTT TTT TTT TTT TTT TV
AGC ACG ACA GAC GCC UGA UUC CUC AGG UAG ACC AAC UUC AGU TTT TTT TTT TTT TTT TV
AGC ACG ACA GAC GCC UGA UUG CAG UUG AGG AAC UUA CGA CAU TTT TTT TTT TTT TTT TV
AGC ACG ACA GAC GCC UGA UUU ACG AAA CAC AGG UCU CAG GUU TTT TTT TTT TTT TTT TV
AGC ACG ACA GAC GCC UGA UUC UUU AUG GUU GAG CUA GCC UAU TTT TTT TTT TTT TTT TV
AGC ACG ACA GAC GCC UGA UUG UCU AGG GUA GCG UUG UCA ACU TTT TTT TTT TTT TTT TV
AGC ACG ACA GAC GCC UGA UUU UUG ACA AGC UCA CUU CGU GAU TTT TTT TTT TTT TTT TV
AGC ACG ACA GAC GCC UGA UUG CCA AGU GAG UUA CGG UUU CAU TTT TTT TTT TTT TTT TV
AGC ACG ACA GAC GCC UGA UUG CUU CUA CAC UUU GUG CUA AGU TTT TTT TTT TTT TTT TV
AGC ACG ACA GAC GCC UGA UUC UUU GUA CAU GGU UCU ACG CAU TTT TTT TTT TTT TTT TV
AGC ACG ACA GAC GCC UGA UUC UUU GAG UAC CGA AGC AAC UCU TTT TTT TTT TTT TTT TV
AGC ACG ACA GAC GCC UGA UUC UUA GUG UUU CCG AAC UAC GCU TTT TTT TTT TTT TTT TV
AGC ACG ACA GAC GCC UGA UUC GGU AGU ACG GUA AGA CUC UUU TTT TTT TTT TTT TTT TV
AGC ACG ACA GAC GCC UGA UUG GAG UCA GAG ACC UAC CGU UUU TTT TTT TTT TTT TTT TV
AGC ACG ACA GAC GCC UGA UUC AAG GGU UGG CUU AAC UGA CCU TTT TTT TTT TTT TTT TV
AGC ACG ACA GAC GCC UGA UUC ACG UAA ACU GAG AGA CUG GUU TTT TTT TTT TTT TTT TV
AGC ACG ACA GAC GCC UGA UUG GCA UGG AAG UCC UUG UCU UAU TTT TTT TTT TTT TTT TV
AGC ACG ACA GAC GCC UGA UUA AGG ACU UCC AUG UUC UCG ACU TTT TTT TTT TTT TTT TV
AGC ACG ACA GAC GCC UGA UUA CGG UAU GUA CUU UCU CUG CAU TTT TTT TTT TTT TTT TV
AGC ACG ACA GAC GCC UGA UUA CCU GUU GUC CUU AAG UGC ACU TTT TTT TTT TTT TTT TV
AGC ACG ACA GAC GCC UGA UUA CCG UAU GCC UUA AGA CAG GUU TTT TTT TTT TTT TTT TV
AGC ACG ACA GAC GCC UGA UUA CAG CAU GCC UAC UUA GAG ACU TTT TTT TTT TTT TTT TV
AGC ACG ACA GAC GCC UGA UUA GUU CUC UCC AAU GUC AGA CGU TTT TTT TTT TTT TTT TV
AGC ACG ACA GAC GCC UGA UUU AAG ACC AAG ACG UGA GCU UUU TTT TTT TTT TTT TTT TV
AGC ACG ACA GAC GCC UGA UUA CGC UAA AGU GUC UGU UAC CCU TTT TTT TTT TTT TTT TV
AGC ACG ACA GAC GCC UGA UUG UAC UCU CCA CUC GUA GGU CAU TTT TTT TTT TTT TTT TV
AGC ACG ACA GAC GCC UGA UUC UUA GUU AGG UUU CGC AAG CUU TTT TTT TTT TTT TTT TV
AGC ACG ACA GAC GCC UGA UUC UUA GGU AUG GUC UGU CGA CAU TTT TTT TTT TTT TTT TV
AGC ACG ACA GAC GCC UGA UUG GAA CGU AUG GCU UGU UGA CCU TTT TTT TTT TTT TTT TV
AGC ACG ACA GAC GCC UGA UUA CUC CUG UUC GUA GUA ACC AGU TTT TTT TTT TTT TTT TV
AGC ACG ACA GAC GCC UGA UUC GGU UAG GAG UAA CGU CUC UAU TTT TTT TTT TTT TTT TV
AGC ACG ACA GAC GCC UGA UUA GGC UAA GGU GUC AAC UGU CUU TTT TTT TTT TTT TTT TV
AGC ACG ACA GAC GCC UGA UUC GGU AAG GUG UAA CUC UCG AUU TTT TTT TTT TTT TTT TV
AGC ACG ACA GAC GCC UGA UUC CCU AGU UCU UGG AAA CCU GUU TTT TTT TTT TTT TTT TV
AGC ACG ACA GAC GCC UGA UUG ACU AGC AAG ACC UAC CUG UCU TTT TTT TTT TTT TTT TV
AGC ACG ACA GAC GCC UGA UUC UGG UUA ACG GUU GAG ACU CCU TTT TTT TTT TTT TTT TV
AGC ACG ACA GAC GCC UGA UUC AAU GGA GAA GCG UAC GUU UCU TTT TTT TTT TTT TTT TV
AGC ACG ACA GAC GCC UGA UUG GGU ACG UAG UGC UUC CUA AGU TTT TTT TTT TTT TTT TV
AGC ACG ACA GAC GCC UGA UUG GGU ACA GGA ACG UAG CUU ACU TTT TTT TTT TTT TTT TV
AGC ACG ACA GAC GCC UGA UUC ACC AGU GUC CAC UUA CUU GGU TTT TTT TTT TTT TTT TV
AGC ACG ACA GAC GCC UGA UUA CUG CUG ACC UCU GUA AAC AGU TTT TTT TTT TTT TTT TV
AGC ACG ACA GAC GCC UGA UUA GUU CUC UGC UUU AAG ACG UGU TTT TTT TTT TTT TTT TV
AGC ACG ACA GAC GCC UGA UUC AUG GAA GUA GGA CAG UCC UCU TTT TTT TTT TTT TTT TV
AGC ACG ACA GAC GCC UGA UUA CGU GAC CAG UGG AGA UGU UCU TTT TTT TTT TTT TTT TV
AGC ACG ACA GAC GCC UGA UUG GAG UAC CAC UUG UUG CUU CAU TTT TTT TTT TTT TTT TV
AGC ACG ACA GAC GCC UGA UUA CGU UCU CCU ACU GUU ACG GAU TTT TTT TTT TTT TTT TV
AGC ACG ACA GAC GCC UGA UUC AGA AUG GUA GUU CCU ACG GUU TTT TTT TTT TTT TTT TV
AGC ACG ACA GAC GCC UGA UUC AGU CUG UUU GAA CGA ACU GGU TTT TTT TTT TTT TTT TV
AGC ACG ACA GAC GCC UGA UUC GUG AGC UCU GGA UGU UUA ACU TTT TTT TTT TTT TTT TV
AGC ACG ACA GAC GCC UGA UUC CAA GCU CUA GGU UGU GUG ACU TTT TTT TTT TTT TTT TV
AGC ACG ACA GAC GCC UGA UUU GCC AAG GUA ACC CUA ACA UGU TTT TTT TTT TTT TTT TV
AGC ACG ACA GAC GCC UGA UUC GGA AGU GGA GUA CCU UUG ACU TTT TTT TTT TTT TTT TV
AGC ACG ACA GAC GCC UGA UUC GUA AGU GGU UGA CGU UCU ACU TTT TTT TTT TTT TTT TV
AGC ACG ACA GAC GCC UGA UUC GUA GAG UAG GAC AAG UCU CCU TTT TTT TTT TTT TTT TV
AGC ACG ACA GAC GCC UGA UUU CGC AAG UGA GUA CUA CGA AAU TTT TTT TTT TTT TTT TV
AGC ACG ACA GAC GCC UGA UUA GCU UCC UUC CUA GUA CAA GGU TTT TTT TTT TTT TTT TV
AGC ACG ACA GAC GCC UGA UUG UGC AGU GUG ACA ACU ACG ACU TTT TTT TTT TTT TTT TV
AGC ACG ACA GAC GCC UGA UUG GCA UGA AAG ACG UAA CUU CGU TTT TTT TTT TTT TTT TV
AGC ACG ACA GAC GCC UGA UUG GAU GAC AAG CCU UAU GCC UUU TTT TTT TTT TTT TTT TV
AGC ACG ACA GAC GCC UGA UUU UCG GUA AAG CGU AUG GAC ACU TTT TTT TTT TTT TTT TV
AGC ACG ACA GAC GCC UGA UUC UUG GUA ACU GGU GUC AAC CGU TTT TTT TTT TTT TTT TV
AGC ACG ACA GAC GCC UGA UUC AGG AGU AAC UGG UUG CAC ACU TTT TTT TTT TTT TTT TV
AGC ACG ACA GAC GCC UGA UUC AUG AAA GAG AGU CUG UCA GCU TTT TTT TTT TTT TTT TV
AGC ACG ACA GAC GCC UGA UUC UAG AGA AGG GUA CAG CUU UCU TTT TTT TTT TTT TTT TV
AGC ACG ACA GAC GCC UGA UUC GGU UAG UCU UGU AGC AAC AUU TTT TTT TTT TTT TTT TV
AGC ACG ACA GAC GCC UGA UUG ACG UAC UAG CAC UUC CAG ACU TTT TTT TTT TTT TTT TV
AGC ACG ACA GAC GCC UGA UUA CAA AUG UAC CGA AGU UGC GAU TTT TTT TTT TTT TTT TV
AGC ACG ACA GAC GCC UGA UUA CGC UUC UUC AAU GUU ACA GGU TTT TTT TTT TTT TTT TV
AGC ACG ACA GAC GCC UGA UUA GUG UUC AGC UUU CCA ACA GUU TTT TTT TTT TTT TTT TV
AGC ACG ACA GAC GCC UGA UUA GGU UCU CUC UAA GCU ACG UCU TTT TTT TTT TTT TTT TV
AGC ACG ACA GAC GCC UGA UUC UCU GAG GUU CCA CAA CAA UGU TTT TTT TTT TTT TTT TV
AGC ACG ACA GAC GCC UGA UUC AGU GUA GGA AGC UAG UCC ACU TTT TTT TTT TTT TTT TV
AGC ACG ACA GAC GCC UGA UUA CGU GUU GAA UGU CAG UUC CUU TTT TTT TTT TTT TTT TV
AGC ACG ACA GAC GCC UGA UUC UGU AGU UGU GGA CUC GAA CAU TTT TTT TTT TTT TTT TV
AGC ACG ACA GAC GCC UGA UUC CUA GCU CUG UGA GUA GUU ACU TTT TTT TTT TTT TTT TV
AGC ACG ACA GAC GCC UGA UUC GAA AGU ACU GGU GAG UCC UCU TTT TTT TTT TTT TTT TV
AGC ACG ACA GAC GCC UGA UUC AGU GGU UAG AAA CAA CGC UAU TTT TTT TTT TTT TTT TV
AGC ACG ACA GAC GCC UGA UUC GUG ACU GCU ACU AAC AAA UGU TTT TTT TTT TTT TTT TV
AGC ACG ACA GAC GCC UGA UUG GCU ACA AGG UCU UGC UGU UAU TTT TTT TTT TTT TTT TV
AGC ACG ACA GAC GCC UGA UUG UCU UCA ACG UGU GGA GAG UCU TTT TTT TTT TTT TTT TV
AGC ACG ACA GAC GCC UGA UUC UGU CGA ACA GGA UGG AGU UCU TTT TTT TTT TTT TTT TV
AGC ACG ACA GAC GCC UGA UUG CGU UAG UUG GAA CUA GAA CCU TTT TTT TTT TTT TTT TV
AGC ACG ACA GAC GCC UGA UUA GGU CUA UGA CAA ACG CAA CUU TTT TTT TTT TTT TTT TV
AGC ACG ACA GAC GCC UGA UUC UGU UUA GUU UAC CUC AAG CGU TTT TTT TTT TTT TTT TV
AGC ACG ACA GAC GCC UGA UUG GUC UAG AGC UCU ACU CGU UAU TTT TTT TTT TTT TTT TV
AGC ACG ACA GAC GCC UGA UUU GGC UUA UGG CUA UGA CUC ACU TTT TTT TTT TTT TTT TV
AGC ACG ACA GAC GCC UGA UUC CUG AAU GGA AGU CAC GUA AGU TTT TTT TTT TTT TTT TV
AGC ACG ACA GAC GCC UGA UUC GUG AAG AGA CAG UCA CUG AUU TTT TTT TTT TTT TTT TV
AGC ACG ACA GAC GCC UGA UUC AGG AGU GGA AGU CAG UAC CUU TTT TTT TTT TTT TTT TV
AGC ACG ACA GAC GCC UGA UUC CGU ACU UCC UGU AAU GUC GAU TTT TTT TTT TTT TTT TV
AGC ACG ACA GAC GCC UGA UUC CGU UUA CGU UUA ACC AGU GGU TTT TTT TTT TTT TTT TV
AGC ACG ACA GAC GCC UGA UUU CCA AGG CUU AGG GAA UGA ACU TTT TTT TTT TTT TTT TV
AGC ACG ACA GAC GCC UGA UUC GCU AAC CAU GGA GUA GUU UCU TTT TTT TTT TTT TTT TV
AGC ACG ACA GAC GCC UGA UUA CGG UAA GCU UUA ACC CUU AGU TTT TTT TTT TTT TTT TV
AGC ACG ACA GAC GCC UGA UUC GUU AAA GUG UGA CAG GUC UCU TTT TTT TTT TTT TTT TV
AGC ACG ACA GAC GCC UGA UUC CGU AAG CAU GUU GUU GUU CAU TTT TTT TTT TTT TTT TV
AGC ACG ACA GAC GCC UGA UUC CCU AGA AUG UUG CUU UCU GAU TTT TTT TTT TTT TTT TV
AGC ACG ACA GAC GCC UGA UUC GGU UUA AUG AGU CAA GCC UAU TTT TTT TTT TTT TTT TV
AGC ACG ACA GAC GCC UGA UUU CGG UAG GAC UAC AAA CCA GUU TTT TTT TTT TTT TTT TV
AGC ACG ACA GAC GCC UGA UUC UAA GAA ACA AGC UGU CAG GUU TTT TTT TTT TTT TTT TV
AGC ACG ACA GAC GCC UGA UUG CAC UCU CUC UAU GUA GCA AGU TTT TTT TTT TTT TTT TV
AGC ACG ACA GAC GCC UGA UUC UGG AGA CUG GAA GGU UUA CCU TTT TTT TTT TTT TTT TV
AGC ACG ACA GAC GCC UGA UUC CAC AGU UUG CGU ACU UGG UAU TTT TTT TTT TTT TTT TV
AGC ACG ACA GAC GCC UGA UUG CUA CAC CUU AAG GUU UAC GGU TTT TTT TTT TTT TTT TV
AGC ACG ACA GAC GCC UGA UUG CUA UGC CUU GGG AAA CAA UGU TTT TTT TTT TTT TTT TV
AGC ACG ACA GAC GCC UGA UUG GCA AUG CUA GUA GGA UGA CCU TTT TTT TTT TTT TTT TV
AGC ACG ACA GAC GCC UGA UUA CCG UAG CAG UGA UGU UGA ACU TTT TTT TTT TTT TTT TV
AGC ACG ACA GAC GCC UGA UUG ACA CCU UAA AUG CAU GCG AAU TTT TTT TTT TTT TTT TV
AGC ACG ACA GAC GCC UGA UUG ACU CCU UCU CUA GUG CUA AGU TTT TTT TTT TTT TTT TV
AGC ACG ACA GAC GCC UGA UUG AAC ACU CAA CUG UCC UGA GCU TTT TTT TTT TTT TTT TV
AGC ACG ACA GAC GCC UGA UUU GAC ACA CUC UUA GCU AGG ACU TTT TTT TTT TTT TTT TV
AGC ACG ACA GAC GCC UGA UUU GAA CCA CUU AUG CUU GUA GCU TTT TTT TTT TTT TTT TV
AGC ACG ACA GAC GCC UGA UUA CGU CUC AGC UUU GGU AUG ACU TTT TTT TTT TTT TTT TV
AGC ACG ACA GAC GCC UGA UUG AGU CUC UCG UCU AUG CUA AAU TTT TTT TTT TTT TTT TV
AGC ACG ACA GAC GCC UGA UUG CUC ACU GUC GUU ACA UGA AAU TTT TTT TTT TTT TTT TV
AGC ACG ACA GAC GCC UGA UUG UUC UUA CUC UAC GAA GUG CAU TTT TTT TTT TTT TTT TV
AGC ACG ACA GAC GCC UGA UUG UUC CAC UAC AGA GAC AAC GUU TTT TTT TTT TTT TTT TV
AGC ACG ACA GAC GCC UGA UUC AUG AGG UUU GCU AAC UUC GGU TTT TTT TTT TTT TTT TV
AGC ACG ACA GAC GCC UGA UUC GUU CGA AGU CCU UCU AAA UGU TTT TTT TTT TTT TTT TV
AGC ACG ACA GAC GCC UGA UUG ACC UGU CUG AGU GUU GGA ACU TTT TTT TTT TTT TTT TV
AGC ACG ACA GAC GCC UGA UUG ACC ACU CUG AGA GGU UGU CAU TTT TTT TTT TTT TTT TV
AGC ACG ACA GAC GCC UGA UUA GUU CCA GAA CCU ACC UAG GCU TTT TTT TTT TTT TTT TV
AGC ACG ACA GAC GCC UGA UUC CAG UAA CAU GGU GUG UUC GAU TTT TTT TTT TTT TTT TV
AGC ACG ACA GAC GCC UGA UUU GCA AGC CAA CAG UUA GAC UAU TTT TTT TTT TTT TTT TV
AGC ACG ACA GAC GCC UGA UUC GGU AAG AAG GUA CCU AGC UUU TTT TTT TTT TTT TTT TV
AGC ACG ACA GAC GCC UGA UUG CAA ACU CUC UGU ACU CUG AGU TTT TTT TTT TTT TTT TV
AGC ACG ACA GAC GCC UGA UUG CUA CAC UCC UAU GAC GUG UCU TTT TTT TTT TTT TTT TV
AGC ACG ACA GAC GCC UGA UUG CAC UGU CUC GUU AUG CUU AAU TTT TTT TTT TTT TTT TV
AGC ACG ACA GAC GCC UGA UUG CUU UCA CCU CAU GUG GAC ACU TTT TTT TTT TTT TTT TV
AGC ACG ACA GAC GCC UGA UUC UGG AAC GUU CAA CCC UUU AGU TTT TTT TTT TTT TTT TV
AGC ACG ACA GAC GCC UGA UUG UCU CCA CUA AAG AAA GCG AUU TTT TTT TTT TTT TTT TV
AGC ACG ACA GAC GCC UGA UUU UGU GCA CAA AGU GAA GAC CUU TTT TTT TTT TTT TTT TV
AGC ACG ACA GAC GCC UGA UUG UCG AUG GUU CAC CUU AAG CCU TTT TTT TTT TTT TTT TV
AGC ACG ACA GAC GCC UGA UUC UAG UGU UGG UAG CUC UAC AGU TTT TTT TTT TTT TTT TV
AGC ACG ACA GAC GCC UGA UUG GCU AAC GUA ACA ACC CUU AGU TTT TTT TTT TTT TTT TV
AGC ACG ACA GAC GCC UGA UUG ACG AUG UAG CUG AGU ACC ACU TTT TTT TTT TTT TTT TV
AGC ACG ACA GAC GCC UGA UUG AGC UCU CAA GGU GUU UGG ACU TTT TTT TTT TTT TTT TV
AGC ACG ACA GAC GCC UGA UUG UCU CCA CUC UAA GCU UGU GAU TTT TTT TTT TTT TTT TV
AGC ACG ACA GAC GCC UGA UUC CCU AGU UGC CAA AGU CAA AGU TTT TTT TTT TTT TTT TV
AGC ACG ACA GAC GCC UGA UUG ACA CUA CCC UUA GAC UGA GGU TTT TTT TTT TTT TTT TV
AGC ACG ACA GAC GCC UGA UUG UAC ACU CUC UGG ACA GGU GUU TTT TTT TTT TTT TTT TV
AGC ACG ACA GAC GCC UGA UUU AGC GAU GCU UCA CAA CUA UGU TTT TTT TTT TTT TTT TV
AGC ACG ACA GAC GCC UGA UUU CCU AGG GUA CAA CAA CAC GUU TTT TTT TTT TTT TTT TV
AGC ACG ACA GAC GCC UGA UUU GGC UAC GUU UCU ACC AAA GUU TTT TTT TTT TTT TTT TV
AGC ACG ACA GAC GCC UGA UUG CAC ACU UUA AUG CAA CUG AGU TTT TTT TTT TTT TTT TV
AGC ACG ACA GAC GCC UGA UUU CCG AAG UCC AGA ACA GUA GUU TTT TTT TTT TTT TTT TV
AGC ACG ACA GAC GCC UGA UUG UCG UAC AGU CCU AAU GCU CUU TTT TTT TTT TTT TTT TV
AGC ACG ACA GAC GCC UGA UUG ACU UAC CAC UCA GCA UGG UGU TTT TTT TTT TTT TTT TV
AGC ACG ACA GAC GCC UGA UUG UUC UAC CAC ACG UGU UCC AGU TTT TTT TTT TTT TTT TV
AGC ACG ACA GAC GCC UGA UUG GUA ACC AAC GAG UUC UGA GGU TTT TTT TTT TTT TTT TV
AGC ACG ACA GAC GCC UGA UUA CAA GUA CAA GCG UUA UGG CAU TTT TTT TTT TTT TTT TV
AGC ACG ACA GAC GCC UGA UUA CGC UUC UUG UCU ACA AGG UUU TTT TTT TTT TTT TTT TV
AGC ACG ACA GAC GCC UGA UUA CCU GUC GUC UCU AAC AUG UGU TTT TTT TTT TTT TTT TV
AGC ACG ACA GAC GCC UGA UUA GGA CUG CAA GUU AGA GUA CCU TTT TTT TTT TTT TTT TV
AGC ACG ACA GAC GCC UGA UUG UAC ACU UCU UGA GGU UGG CAU TTT TTT TTT TTT TTT TV
AGC ACG ACA GAC GCC UGA UUG UGA UGC GUU CCC AAC UUU AGU TTT TTT TTT TTT TTT TV
AGC ACG ACA GAC GCC UGA UUC UGA UGA CAG UGG AGU AGU CCU TTT TTT TTT TTT TTT TV
AGC ACG ACA GAC GCC UGA UUC UAG GGA AGG AAC UAC GGU UCU TTT TTT TTT TTT TTT TV
AGC ACG ACA GAC GCC UGA UUG UAA CGA GUC UCA CCU CAA AGU TTT TTT TTT TTT TTT TV
AGC ACG ACA GAC GCC UGA UUG UGU GAC GAA CUC UUC UCU GAU TTT TTT TTT TTT TTT TV
AGC ACG ACA GAC GCC UGA UUG UCA GCU CUG AGG AAU GAA ACU TTT TTT TTT TTT TTT TV
AGC ACG ACA GAC GCC UGA UUG UAG UGC UCA GGA GUG ACA ACU TTT TTT TTT TTT TTT TV
AGC ACG ACA GAC GCC UGA UUG UGG UCA AAG CGA UGA ACC UUU TTT TTT TTT TTT TTT TV
AGC ACG ACA GAC GCC UGA UUG UAA CAC CAC AAG UCU UGG CAU TTT TTT TTT TTT TTT TV
AGC ACG ACA GAC GCC UGA UUC UGU UAG UGU UAC CGA AGC CUU TTT TTT TTT TTT TTT TV
AGC ACG ACA GAC GCC UGA UUG UAA CCA AAC CAU GCU AGC UGU TTT TTT TTT TTT TTT TV
AGC ACG ACA GAC GCC UGA UUG UGG ACA ACU AGG CUA AUG GCU TTT TTT TTT TTT TTT TV
AGC ACG ACA GAC GCC UGA UUG UAA ACC CAA CCG UUG UAC CGU TTT TTT TTT TTT TTT TV
AGC ACG ACA GAC GCC UGA UUG AAU GUC CUG UCC AAC UGG UGU TTT TTT TTT TTT TTT TV
AGC ACG ACA GAC GCC UGA UUG UCA ACC CUU CCA GUC UGA GAU TTT TTT TTT TTT TTT TV
AGC ACG ACA GAC GCC UGA UUC AUG UUU GAG GUU CGU CAC ACU TTT TTT TTT TTT TTT TV
AGC ACG ACA GAC GCC UGA UUU GUC CUA UGU ACC UGU ACG CAU TTT TTT TTT TTT TTT TV
AGC ACG ACA GAC GCC UGA UUU GAG CUC AUG UCC UUU AAC UGU TTT TTT TTT TTT TTT TV
AGC ACG ACA GAC GCC UGA UUC GUA ACU GUA ACC CUU UCG GAU TTT TTT TTT TTT TTT TV
AGC ACG ACA GAC GCC UGA UUG GGA ACU GCA CUU UCA CAA UGU TTT TTT TTT TTT TTT TV
AGC ACG ACA GAC GCC UGA UUG GGU AAC GUG ACC UCA UGG UUU TTT TTT TTT TTT TTT TV
AGC ACG ACA GAC GCC UGA UUG AGG UAC ACG UUU CUC CUU GAU TTT TTT TTT TTT TTT TV
AGC ACG ACA GAC GCC UGA UUG ACC UAC UAG UCG UCU CCU GAU TTT TTT TTT TTT TTT TV
AGC ACG ACA GAC GCC UGA UUC AGA GAU GUG UGA CCU AGU CCU TTT TTT TTT TTT TTT TV
AGC ACG ACA GAC GCC UGA UUG UCG AAG AUG UCC UCU CUA UGU TTT TTT TTT TTT TTT TV
AGC ACG ACA GAC GCC UGA UUG UGU CCA CAA GGA UGA GUU CGU TTT TTT TTT TTT TTT TV
AGC ACG ACA GAC GCC UGA UUU GUG CAU GAA CUC ACC AAC UGU TTT TTT TTT TTT TTT TV
AGC ACG ACA GAC GCC UGA UUG UGC AAC ACU CCU GUC CUA UGU TTT TTT TTT TTT TTT TV
AGC ACG ACA GAC GCC UGA UUG UCC AUG CAG UCU UCU ACU AGU TTT TTT TTT TTT TTT TV
AGC ACG ACA GAC GCC UGA UUC CAA CUG AGG UUC UUG CUC UAU TTT TTT TTT TTT TTT TV
AGC ACG ACA GAC GCC UGA UUG UCC UCA GAA ACU CCA CAU GGU TTT TTT TTT TTT TTT TV
AGC ACG ACA GAC GCC UGA UUU GGG AAC ACC UGU CCU GUC UAU TTT TTT TTT TTT TTT TV
AGC ACG ACA GAC GCC UGA UUC UAA GAG AAA UGG CUU CCG AAU TTT TTT TTT TTT TTT TV
AGC ACG ACA GAC GCC UGA UUC AGA AUG AGG AAC UGU UCC GAU TTT TTT TTT TTT TTT TV
AGC ACG ACA GAC GCC UGA UUC AGA AUG AUG GAA CUG CUU CAU TTT TTT TTT TTT TTT TV
AGC ACG ACA GAC GCC UGA UUG AGA GCU ACC CUU GAC ACA UGU TTT TTT TTT TTT TTT TV
AGC ACG ACA GAC GCC UGA UUG GUU CCA CAU GGU GUA AAG GCU TTT TTT TTT TTT TTT TV
AGC ACG ACA GAC GCC UGA UUG UAC CUC ACC UCA GCA GUU AGU TTT TTT TTT TTT TTT TV
AGC ACG ACA GAC GCC UGA UUG UCA ACU CAC UCG ACU UGG AGU TTT TTT TTT TTT TTT TV
AGC ACG ACA GAC GCC UGA UUG UCA UGU AGC UUC UCA ACU CGU TTT TTT TTT TTT TTT TV
AGC ACG ACA GAC GCC UGA UUC UAG GGU UGC UCA CUC AGA AAU TTT TTT TTT TTT TTT TV
AGC ACG ACA GAC GCC UGA UUC UUG GAG AGG UAG CUG UAC UCU TTT TTT TTT TTT TTT TV
AGC ACG ACA GAC GCC UGA UUC UUU GUA CAA GUG GAG UGC UCU TTT TTT TTT TTT TTT TV
AGC ACG ACA GAC GCC UGA UUA GUC GAC UCA AGA AAU GUA GCU TTT TTT TTT TTT TTT TV
AGC ACG ACA GAC GCC UGA UUC AAG UGU UGU AGU CCU ACG GUU TTT TTT TTT TTT TTT TV
AGC ACG ACA GAC GCC UGA UUC GAC UUC GUC ACA ACA GGA AUU TTT TTT TTT TTT TTT TV
AGC ACG ACA GAC GCC UGA UUC GAC UUG UGA ACC ACA GAA CUU TTT TTT TTT TTT TTT TV
AGC ACG ACA GAC GCC UGA UUC GUU AAA GGG AAC UCG AGU ACU TTT TTT TTT TTT TTT TV
AGC ACG ACA GAC GCC UGA UUA GCU UGU UGU UAA CCU UCA GCU TTT TTT TTT TTT TTT TV
AGC ACG ACA GAC GCC UGA UUC AGU GUU UGU UUA CCA UGC GAU TTT TTT TTT TTT TTT TV
AGC ACG ACA GAC GCC UGA UUG CAG UUU GGC UUU AGU ACC AGU TTT TTT TTT TTT TTT TV
AGC ACG ACA GAC GCC UGA UUA GGC UAG GUA CCU UCU UAA CGU TTT TTT TTT TTT TTT TV
AGC ACG ACA GAC GCC UGA UUC UGG AAG GAC AAC UUU CAC UGU TTT TTT TTT TTT TTT TV
AGC ACG ACA GAC GCC UGA UUU AGA CUG GUA CCC AAC UCC UGU TTT TTT TTT TTT TTT TV
AGC ACG ACA GAC GCC UGA UUC AGG AGU GUU UGC ACA GUU UCU TTT TTT TTT TTT TTT TV
AGC ACG ACA GAC GCC UGA UUC UGG AGU UUG UCG AAC UAC GAU TTT TTT TTT TTT TTT TV
AGC ACG ACA GAC GCC UGA UUC GGA UGG UGU GAA CUA ACC UGU TTT TTT TTT TTT TTT TV
AGC ACG ACA GAC GCC UGA UUC UGG AUG GAG UGA CGU AAA CCU TTT TTT TTT TTT TTT TV
AGC ACG ACA GAC GCC UGA UUC GCU AAA GCA UGA GGU UAA ACU TTT TTT TTT TTT TTT TV
AGC ACG ACA GAC GCC UGA UUG CCU AGG UUG GAA CGU ACA AAU TTT TTT TTT TTT TTT TV
AGC ACG ACA GAC GCC UGA UUU GCC UAC UGG AAA CAA ACG AUU TTT TTT TTT TTT TTT TV
AGC ACG ACA GAC GCC UGA UUC UGC AGU UAA GAC AAG GAU GCU TTT TTT TTT TTT TTT TV
AGC ACG ACA GAC GCC UGA UUG GGU AGC CAA GAC UUA CCA GUU TTT TTT TTT TTT TTT TV
AGC ACG ACA GAC GCC UGA UUC AGU UGG UGU UGC ACA UGG ACU TTT TTT TTT TTT TTT TV
AGC ACG ACA GAC GCC UGA UUC AUG UUG AGG AGU CCU GUG ACU TTT TTT TTT TTT TTT TV
AGC ACG ACA GAC GCC UGA UUG UCU GCA CAG AAU GAG AGU ACU TTT TTT TTT TTT TTT TV
AGC ACG ACA GAC GCC UGA UUG UCG UGA CAA AGU GUG GAA CCU TTT TTT TTT TTT TTT TV
AGC ACG ACA GAC GCC UGA UUC GAC UUU AUG GAC AGA CGA GUU TTT TTT TTT TTT TTT TV
AGC ACG ACA GAC GCC UGA UUC GAA UGG UAG AAC ACA CCU UGU TTT TTT TTT TTT TTT TV
AGC ACG ACA GAC GCC UGA UUC GUU CUA AGU ACA ACA CGA GUU TTT TTT TTT TTT TTT TV
AGC ACG ACA GAC GCC UGA UUA CUG GUU UGU UGA CAA UGC CUU TTT TTT TTT TTT TTT TV
AGC ACG ACA GAC GCC UGA UUA GCA GUC GUU AAC AAC UAC UGU TTT TTT TTT TTT TTT TV
AGC ACG ACA GAC GCC UGA UUC UAG UUU GUU UGA CCU GAG CAU TTT TTT TTT TTT TTT TV
AGC ACG ACA GAC GCC UGA UUA GGC UUA CUC AAA GUA CGA CAU TTT TTT TTT TTT TTT TV
AGC ACG ACA GAC GCC UGA UUC AUG GUA AUG UUC GUC UAG CCU TTT TTT TTT TTT TTT TV
AGC ACG ACA GAC GCC UGA UUC GUG UAA CAC UAG AAC ACU CGU TTT TTT TTT TTT TTT TV
AGC ACG ACA GAC GCC UGA UUA GCU GUA CAC ACG UAA ACC UGU TTT TTT TTT TTT TTT TV
AGC ACG ACA GAC GCC UGA UUG AGC UUA CAU GGA AGG AAC CUU TTT TTT TTT TTT TTT TV
AGC ACG ACA GAC GCC UGA UUG UCU AAG UAA CAG CAA AGC CUU TTT TTT TTT TTT TTT TV
AGC ACG ACA GAC GCC UGA UUU CGC AAC GAA CAG UUA CUU UGU TTT TTT TTT TTT TTT TV
AGC ACG ACA GAC GCC UGA UUC GAG UUA GAA GUU CCA AGC AUU TTT TTT TTT TTT TTT TV
AGC ACG ACA GAC GCC UGA UUU UUC AGA GCA CAG UAC UCA GGU TTT TTT TTT TTT TTT TV
AGC ACG ACA GAC GCC UGA UUC GUG AAG GAA GAC UUG AGU CCU TTT TTT TTT TTT TTT TV
AGC ACG ACA GAC GCC UGA UUC AUG UUA GUG AAC GGA ACC CUU TTT TTT TTT TTT TTT TV
AGC ACG ACA GAC GCC UGA UUC UCC AAG AAA UGC AGU ACU GGU TTT TTT TTT TTT TTT TV
AGC ACG ACA GAC GCC UGA UUG UAC AAC CAG AAC UAG GCU UGU TTT TTT TTT TTT TTT TV
AGC ACG ACA GAC GCC UGA UUG CUA CAA CAA AGG UAG GUC UGU TTT TTT TTT TTT TTT TV
AGC ACG ACA GAC GCC UGA UUC UUG CAG UCA AAG AAG GGU UCU TTT TTT TTT TTT TTT TV
AGC ACG ACA GAC GCC UGA UUU GGU CAG AGG ACU AAA CGA CUU TTT TTT TTT TTT TTT TV
AGC ACG ACA GAC GCC UGA UUC UCC AGU UGA ACG AAG AGA CUU TTT TTT TTT TTT TTT TV
AGC ACG ACA GAC GCC UGA UUA CUG UCU CUG UUA AGA AUG CGU TTT TTT TTT TTT TTT TV
AGC ACG ACA GAC GCC UGA UUA GUU UCC UCU CAA GAG ACU CGU TTT TTT TTT TTT TTT TV
AGC ACG ACA GAC GCC UGA UUG GUG UAC GUC UAC UCA CUA CGU TTT TTT TTT TTT TTT TV
AGC ACG ACA GAC GCC UGA UUC UGC AGA AGG UAA CAA GCU UUU TTT TTT TTT TTT TTT TV
AGC ACG ACA GAC GCC UGA UUU UGG CUA CUC CAG UAC AAA GUU TTT TTT TTT TTT TTT TV
AGC ACG ACA GAC GCC UGA UUU CUU GCA CUU AAG AGG UAA GCU TTT TTT TTT TTT TTT TV
AGC ACG ACA GAC GCC UGA UUU CGC UUA GCU UUA AGA GGU UCU TTT TTT TTT TTT TTT TV
AGC ACG ACA GAC GCC UGA UUC GAC UCA AGC UUG UUU AGG UCU TTT TTT TTT TTT TTT TV
AGC ACG ACA GAC GCC UGA UUC GUU GGA AGA ACC UAU GCA AAU TTT TTT TTT TTT TTT TV
AGC ACG ACA GAC GCC UGA UUC AUG AGA GGA AUG CAA CUU GCU TTT TTT TTT TTT TTT TV
AGC ACG ACA GAC GCC UGA UUC UCA UGU AUG UCG UGU ACC GAU TTT TTT TTT TTT TTT TV
AGC ACG ACA GAC GCC UGA UUC UUC GAC UCA GAA ACA GAG GUU TTT TTT TTT TTT TTT TV
AGC ACG ACA GAC GCC UGA UUU UUA GAC UAG CCA ACA CGU GUU TTT TTT TTT TTT TTT TV
AGC ACG ACA GAC GCC UGA UUC AUG GUG AAA GGC UUA AAC CGU TTT TTT TTT TTT TTT TV
AGC ACG ACA GAC GCC UGA UUC CUC AGU UAG UCC AUG AAC CGU TTT TTT TTT TTT TTT TV
AGC ACG ACA GAC GCC UGA UUU CCC AUG UGA AAC UGA ACG GUU TTT TTT TTT TTT TTT TV
AGC ACG ACA GAC GCC UGA UUC UAC AGU CAA GUG GAG AGG UCU TTT TTT TTT TTT TTT TV
AGC ACG ACA GAC GCC UGA UUC UGC UAC ACU GAG GUA AAG ACU TTT TTT TTT TTT TTT TV
AGC ACG ACA GAC GCC UGA UUC UUA UGG AAG GAC UCA GCU GUU TTT TTT TTT TTT TTT TV
AGC ACG ACA GAC GCC UGA UUC CUA GGA AGG CAA UGA CAG UUU TTT TTT TTT TTT TTT TV
AGC ACG ACA GAC GCC UGA UUC CUU CGA ACG AAU GAA UGG ACU TTT TTT TTT TTT TTT TV
AGC ACG ACA GAC GCC UGA UUG CCU UAC UAC CAA GAG GUG ACU TTT TTT TTT TTT TTT TV
AGC ACG ACA GAC GCC UGA UUG UCA CCA ACU AAA GCU GAU GGU TTT TTT TTT TTT TTT TV
AGC ACG ACA GAC GCC UGA UUU GUC CAG UGG AGU CAG GUA ACU TTT TTT TTT TTT TTT TV
AGC ACG ACA GAC GCC UGA UUU UGA CGA CAA AGA UGC CAA CUU TTT TTT TTT TTT TTT TV
AGC ACG ACA GAC GCC UGA UUC GGA UGU UAA AGA CAC AAC GUU TTT TTT TTT TTT TTT TV
AGC ACG ACA GAC GCC UGA UUC GUG AUG UCA AAG CCA AAC UGU TTT TTT TTT TTT TTT TV
AGC ACG ACA GAC GCC UGA UUC AAG AAU GAG UUG CAA ACC GUU TTT TTT TTT TTT TTT TV
AGC ACG ACA GAC GCC UGA UUC UGA GGA AGU AAA CAG UCG UCU TTT TTT TTT TTT TTT TV
AGC ACG ACA GAC GCC UGA UUG UCG AAG UCG AAA UGG AGU CCU TTT TTT TTT TTT TTT TV
AGC ACG ACA GAC GCC UGA UUA GCC UUC UGU CUA GAC UUG AUU TTT TTT TTT TTT TTT TV
AGC ACG ACA GAC GCC UGA UUA GGU UUC UUG CUG AUG ACG ACU TTT TTT TTT TTT TTT TV
AGC ACG ACA GAC GCC UGA UUA UGU GCU UUC CAU GUA CAC GAU TTT TTT TTT TTT TTT TV
AGC ACG ACA GAC GCC UGA UUA GUG UUC UCC AUG CUU CAA AGU TTT TTT TTT TTT TTT TV
AGC ACG ACA GAC GCC UGA UUC GCU AAC UAA ACA GAG GAC UUU TTT TTT TTT TTT TTT TV
AGC ACG ACA GAC GCC UGA UUC GAC UAG CAU GGU UUG GUU ACU TTT TTT TTT TTT TTT TV
AGC ACG ACA GAC GCC UGA UUG CUG AUG GUG AGU CAA UGU CCU TTT TTT TTT TTT TTT TV
AGC ACG ACA GAC GCC UGA UUC UAU GGU GUA UGC AGU ACC CAU TTT TTT TTT TTT TTT TV
AGC ACG ACA GAC GCC UGA UUC CGU AAA UGA AGA CGA GUU CUU TTT TTT TTT TTT TTT TV
AGC ACG ACA GAC GCC UGA UUC UCG UAC UAG GAC AAA GAC CUU TTT TTT TTT TTT TTT TV
AGC ACG ACA GAC GCC UGA UUC UCG AGU UGA CCU UAA CCA UGU TTT TTT TTT TTT TTT TV
AGC ACG ACA GAC GCC UGA UUC GAG AGU AAG UCG UUA CAA GCU TTT TTT TTT TTT TTT TV
AGC ACG ACA GAC GCC UGA UUC CAA AUG CUA GGA GAG UGG UCU TTT TTT TTT TTT TTT TV
AGC ACG ACA GAC GCC UGA UUC UGC UAC CAA UGG GAA UGG ACU TTT TTT TTT TTT TTT TV
AGC ACG ACA GAC GCC UGA UUC CCU AUG UAC GAC ACA GAG UGU TTT TTT TTT TTT TTT TV
AGC ACG ACA GAC GCC UGA UUG GGU ACG GUU UCC ACA CAA GUU TTT TTT TTT TTT TTT TV
AGC ACG ACA GAC GCC UGA UUU CCU GUA UGA CAC CAA GGC AUU TTT TTT TTT TTT TTT TV
AGC ACG ACA GAC GCC UGA UUA GUU UCU AGU CUG ACU UCC GAU TTT TTT TTT TTT TTT TV
AGC ACG ACA GAC GCC UGA UUA GAC UUC ACC UCU GGU ACU GGU TTT TTT TTT TTT TTT TV
AGC ACG ACA GAC GCC UGA UUA GAG CUC AGU UUC CCU UUA UGU TTT TTT TTT TTT TTT TV
AGC ACG ACA GAC GCC UGA UUC AAC UGG AGU UCU CCU CUU AGU TTT TTT TTT TTT TTT TV
AGC ACG ACA GAC GCC UGA UUC GAG UGG AGU AAA CUU CCU AGU TTT TTT TTT TTT TTT TV
AGC ACG ACA GAC GCC UGA UUG ACC UAC UUU AGC AGA CGU UGU TTT TTT TTT TTT TTT TV
AGC ACG ACA GAC GCC UGA UUU AGC CUA CUA UGU UGA UGA CGU TTT TTT TTT TTT TTT TV
AGC ACG ACA GAC GCC UGA UUA GUU CUC UCU CUA GUG ACG AUU TTT TTT TTT TTT TTT TV
AGC ACG ACA GAC GCC UGA UUA GGU CUC CUU CAU GUG ACA AGU TTT TTT TTT TTT TTT TV
AGC ACG ACA GAC GCC UGA UUU CGG AAG UUU CUA GAG UCU CCU TTT TTT TTT TTT TTT TV
AGC ACG ACA GAC GCC UGA UUC UGG AAG UAG AAG CGU AAC UCU TTT TTT TTT TTT TTT TV
AGC ACG ACA GAC GCC UGA UUG ACC UAC CCU UAA GGA CUG GUU TTT TTT TTT TTT TTT TV
AGC ACG ACA GAC GCC UGA UUC CGA UGU AAU GUU CUA GGC UUU TTT TTT TTT TTT TTT TV
AGC ACG ACA GAC GCC UGA UUC AAU GAU GGA GUG CUU UCA GCU TTT TTT TTT TTT TTT TV
AGC ACG ACA GAC GCC UGA UUC UAG GGA UGG AGU CAC ACU GAU TTT TTT TTT TTT TTT TV
AGC ACG ACA GAC GCC UGA UUU CCG AAA CAG AGU UAA GUA GCU TTT TTT TTT TTT TTT TV
AGC ACG ACA GAC GCC UGA UUU CCC UAG ACC AGU GAA AGC AUU TTT TTT TTT TTT TTT TV
AGC ACG ACA GAC GCC UGA UUC UGG UCA UGA ACG AAC AAC UGU TTT TTT TTT TTT TTT TV
AGC ACG ACA GAC GCC UGA UUC CCU AAG UAG UCG UUU CGU GAU TTT TTT TTT TTT TTT TV
AGC ACG ACA GAC GCC UGA UUC GCU UGA UGA ACC AAA CAA UGU TTT TTT TTT TTT TTT TV
AGC ACG ACA GAC GCC UGA UUC GCA UGU UGU ACC ACA AGA AUU TTT TTT TTT TTT TTT TV
AGC ACG ACA GAC GCC UGA UUA CAA AUG AAC CGU UGG UCA GGU TTT TTT TTT TTT TTT TV
AGC ACG ACA GAC GCC UGA UUU CAA GGC AAG ACG UAA UGG UCU TTT TTT TTT TTT TTT TV
AGC ACG ACA GAC GCC UGA UUC AAA GCU CAA UGA GGU AUG GCU TTT TTT TTT TTT TTT TV
AGC ACG ACA GAC GCC UGA UUG ACA GGU UAC GGA AGA GUC CUU TTT TTT TTT TTT TTT TV
AGC ACG ACA GAC GCC UGA UUU CAG GUU ACG AAA UGC ACU CCU TTT TTT TTT TTT TTT TV
AGC ACG ACA GAC GCC UGA UUA GAC ACU ACU UUC GCU UGU GAU TTT TTT TTT TTT TTT TV
AGC ACG ACA GAC GCC UGA UUG AAC UCA AGU CGU CUC UUC GAU TTT TTT TTT TTT TTT TV
AGC ACG ACA GAC GCC UGA UUC GUC AGU UGU ACC AAA GCC AUU TTT TTT TTT TTT TTT TV
AGC ACG ACA GAC GCC UGA UUC AGU AGG UGU UCC AAC GUC UCU TTT TTT TTT TTT TTT TV
AGC ACG ACA GAC GCC UGA UUC GUG AGG UUU GAA CAG CUU UCU TTT TTT TTT TTT TTT TV
AGC ACG ACA GAC GCC UGA UUU CCG AAG UUU CGA AGA CUC ACU TTT TTT TTT TTT TTT TV
AGC ACG ACA GAC GCC UGA UUC CCA AGU UCC GUU AAC ACU GGU TTT TTT TTT TTT TTT TV
AGC ACG ACA GAC GCC UGA UUC CGU AGU ACC AAG UAC ACC UGU TTT TTT TTT TTT TTT TV
AGC ACG ACA GAC GCC UGA UUC AAG CUA CGU AAG GAU GGU ACU TTT TTT TTT TTT TTT TV
AGC ACG ACA GAC GCC UGA UUC CUG UAC CUA GUG GAA GUA GCU TTT TTT TTT TTT TTT TV
AGC ACG ACA GAC GCC UGA UUA GCC UUG ACU UGU UGA GGU ACU TTT TTT TTT TTT TTT TV
AGC ACG ACA GAC GCC UGA UUC AAG CUU AGU CUC UUG GGU ACU TTT TTT TTT TTT TTT TV
AGC ACG ACA GAC GCC UGA UUC ACA GGU CAG UGU UUG GUU CAU TTT TTT TTT TTT TTT TV
AGC ACG ACA GAC GCC UGA UUC UAA GUU GGU UCG AUG UGC ACU TTT TTT TTT TTT TTT TV
AGC ACG ACA GAC GCC UGA UUC UAA UGG UAG UAC GCU AAG CAU TTT TTT TTT TTT TTT TV
AGC ACG ACA GAC GCC UGA UUC GUG AUG GUU GAA CGU CAA ACU TTT TTT TTT TTT TTT TV
AGC ACG ACA GAC GCC UGA UUC CUC UGA GUG GAC AAG CUA AAU TTT TTT TTT TTT TTT TV
AGC ACG ACA GAC GCC UGA UUG CUC UAA CUA AGA AAG UAG CGU TTT TTT TTT TTT TTT TV
AGC ACG ACA GAC GCC UGA UUC CAG UAA CAG UGG AAA GGC UUU TTT TTT TTT TTT TTT TV
AGC ACG ACA GAC GCC UGA UUC CCA AUG UCU GAG GUA ACA GGU TTT TTT TTT TTT TTT TV
AGC ACG ACA GAC GCC UGA UUC CCU UAG AGA CCU AAA UGA CGU TTT TTT TTT TTT TTT TV
AGC ACG ACA GAC GCC UGA UUC AGU AGU GUA ACC CAA GAC GUU TTT TTT TTT TTT TTT TV
AGC ACG ACA GAC GCC UGA UUC AAA GCU GAC UGG UUC UGU GAU TTT TTT TTT TTT TTT TV
AGC ACG ACA GAC GCC UGA UUC UGG AGU UAC GAG AGU ACC ACU TTT TTT TTT TTT TTT TV
AGC ACG ACA GAC GCC UGA UUC ACG AGU CUU GGU AGG AGU UCU TTT TTT TTT TTT TTT TV
AGC ACG ACA GAC GCC UGA UUC GGU UAU GCG UUC AAG UCA AAU TTT TTT TTT TTT TTT TV
AGC ACG ACA GAC GCC UGA UUA GUG UUC UCG UGA GGU CUC AAU TTT TTT TTT TTT TTT TV
AGC ACG ACA GAC GCC UGA UUU AGC GAA CCC AAU GAC UUU GUU TTT TTT TTT TTT TTT TV
AGC ACG ACA GAC GCC UGA UUG AGC ACU CUA GGU UUG UUC GAU TTT TTT TTT TTT TTT TV
AGC ACG ACA GAC GCC UGA UUC AUG AGG UUG UAG CUA AGA CCU TTT TTT TTT TTT TTT TV
AGC ACG ACA GAC GCC UGA UUC UAG UUG GAA GGC UUC AAA GCU TTT TTT TTT TTT TTT TV
AGC ACG ACA GAC GCC UGA UUC GUG AGU UUG UGA CAC CUG UAU TTT TTT TTT TTT TTT TV
AGC ACG ACA GAC GCC UGA UUA GGU UCC CUU GUU AUG AAC GGU TTT TTT TTT TTT TTT TV
AGC ACG ACA GAC GCC UGA UUU CCA GAC AUG CUU UGG GUA CUU TTT TTT TTT TTT TTT TV
AGC ACG ACA GAC GCC UGA UUU CCC UAG CGU AAA GAG AAC AUU TTT TTT TTT TTT TTT TV
AGC ACG ACA GAC GCC UGA UUC AGC UUU CGU CUG AAG UCA AAU TTT TTT TTT TTT TTT TV
AGC ACG ACA GAC GCC UGA UUC AAG CGU AUG UCG UUU CUG UAU TTT TTT TTT TTT TTT TV
AGC ACG ACA GAC GCC UGA UUC ACA GGU AGU UCU UCU GGU GAU TTT TTT TTT TTT TTT TV
AGC ACG ACA GAC GCC UGA UUA ACC AUG ACC UGU CGU UCG UAU TTT TTT TTT TTT TTT TV
AGC ACG ACA GAC GCC UGA UUA CGA CUA CAU GGU UGG AGU UCU TTT TTT TTT TTT TTT TV
AGC ACG ACA GAC GCC UGA UUU CGU GUA CUG AAG AAC GCA AUU TTT TTT TTT TTT TTT TV
AGC ACG ACA GAC GCC UGA UUC GUG UAC UAC AGG AAG CAG AUU TTT TTT TTT TTT TTT TV
AGC ACG ACA GAC GCC UGA UUG GUU CUA GGU UGC AAG UGA CCU TTT TTT TTT TTT TTT TV
AGC ACG ACA GAC GCC UGA UUG GGU UAC UGU CGU ACU AAG CCU TTT TTT TTT TTT TTT TV
AGC ACG ACA GAC GCC UGA UUC UGG UCA GAC CAC UUC ACU UGU TTT TTT TTT TTT TTT TV
AGC ACG ACA GAC GCC UGA UUU AGG CUA GUC ACA CUA CUC UGU TTT TTT TTT TTT TTT TV
AGC ACG ACA GAC GCC UGA UUC AAA GUU GCU ACU CCU UGU GAU TTT TTT TTT TTT TTT TV
AGC ACG ACA GAC GCC UGA UUU CCA GUC GUU UCA CUU ACA GGU TTT TTT TTT TTT TTT TV
AGC ACG ACA GAC GCC UGA UUC CAG UUU GUC CUC AAC UAG GGU TTT TTT TTT TTT TTT TV
AGC ACG ACA GAC GCC UGA UUA AAC UUG CUA GGU GUG AUG CCU TTT TTT TTT TTT TTT TV
AGC ACG ACA GAC GCC UGA UUA CAA GCU CUG UAG GGU AGG UCU TTT TTT TTT TTT TTT TV
AGC ACG ACA GAC GCC UGA UUC GAG UCC AAC UUG UUA CGA AAU TTT TTT TTT TTT TTT TV
AGC ACG ACA GAC GCC UGA UUC AGU GCA ACC UGU UUC UUU GAU TTT TTT TTT TTT TTT TV
AGC ACG ACA GAC GCC UGA UUG GGU UCA AGG ACU CUA AGA CGU TTT TTT TTT TTT TTT TV
AGC ACG ACA GAC GCC UGA UUU ACA AGG GAA ACG UUU CAG CAU TTT TTT TTT TTT TTT TV
AGC ACG ACA GAC GCC UGA UUC GUC UGA GUC AAA CAA ACC UGU TTT TTT TTT TTT TTT TV
AGC ACG ACA GAC GCC UGA UUA CGC UUU CUU UAU GUC GAA GGU TTT TTT TTT TTT TTT TV
AGC ACG ACA GAC GCC UGA UUA CCU UGC UUG CUA AUG GUU CAU TTT TTT TTT TTT TTT TV
AGC ACG ACA GAC GCC UGA UUC CAG UUU GUG CUC AAG GUU CAU TTT TTT TTT TTT TTT TV
AGC ACG ACA GAC GCC UGA UUG AGG UAC UGU CCA AGA ACC CUU TTT TTT TTT TTT TTT TV
AGC ACG ACA GAC GCC UGA UUA GGG UAC GAA CUC CUU UAC AGU TTT TTT TTT TTT TTT TV
AGC ACG ACA GAC GCC UGA UUA CAG UGU GAC UUC CUU CUC GAU TTT TTT TTT TTT TTT TV
AGC ACG ACA GAC GCC UGA UUG ACA GCU GAC ACU UCC UUU AGU TTT TTT TTT TTT TTT TV
AGC ACG ACA GAC GCC UGA UUC ACA CGU UUG ACC UUA UGU GCU TTT TTT TTT TTT TTT TV
AGC ACG ACA GAC GCC UGA UUC CUG UGA AUG UUC CUU CAA CGU TTT TTT TTT TTT TTT TV
AGC ACG ACA GAC GCC UGA UUC AUG UUG UUU GUC AGC UCA CAU TTT TTT TTT TTT TTT TV
AGC ACG ACA GAC GCC UGA UUG UCC AGU CGU GUU AGA GUA GCU TTT TTT TTT TTT TTT TV
AGC ACG ACA GAC GCC UGA UUA CAU GCA CUU GAA GGU UAG GCU TTT TTT TTT TTT TTT TV
AGC ACG ACA GAC GCC UGA UUU CCG AAC CUA GAG GUG UUU ACU TTT TTT TTT TTT TTT TV
AGC ACG ACA GAC GCC UGA UUU UUC GAG UCG AGA GUC AAG ACU TTT TTT TTT TTT TTT TV
AGC ACG ACA GAC GCC UGA UUU UUG UCA AGU CCA CUC UGC AGU TTT TTT TTT TTT TTT TV
AGC ACG ACA GAC GCC UGA UUG UCU UAA GUA CAC CAG AGC UGU TTT TTT TTT TTT TTT TV
AGC ACG ACA GAC GCC UGA UUG UCG UAA ACG UCU CUC UCG UAU TTT TTT TTT TTT TTT TV
AGC ACG ACA GAC GCC UGA UUU CCU UGA CGA GAG UAG GGU ACU TTT TTT TTT TTT TTT TV
AGC ACG ACA GAC GCC UGA UUC GGU AAC CAG UUG UGU CGU UAU TTT TTT TTT TTT TTT TV
AGC ACG ACA GAC GCC UGA UUG AGG UCU ACC GUU AUG ACG UGU TTT TTT TTT TTT TTT TV
AGC ACG ACA GAC GCC UGA UUA CUA CUG ACU GUU GCU UGG GAU TTT TTT TTT TTT TTT TV
AGC ACG ACA GAC GCC UGA UUG AGC UCA CAG GUG UUC GUU UAU TTT TTT TTT TTT TTT TV
AGC ACG ACA GAC GCC UGA UUA CCG UUG UUG AGU CUG GUA ACU TTT TTT TTT TTT TTT TV
AGC ACG ACA GAC GCC UGA UUA CGU UGG UUG GUC AAG CUA ACU TTT TTT TTT TTT TTT TV
AGC ACG ACA GAC GCC UGA UUA GGA CUC CUG UAG UGA UGG UCU TTT TTT TTT TTT TTT TV
AGC ACG ACA GAC GCC UGA UUC UGC UAC CGU AAG AAG AGU ACU TTT TTT TTT TTT TTT TV
AGC ACG ACA GAC GCC UGA UUU UUC ACG UUG UCG AUG GCA AAU TTT TTT TTT TTT TTT TV
AGC ACG ACA GAC GCC UGA UUA CAC GUU GUA CCC AAG AGA CUU TTT TTT TTT TTT TTT TV
AGC ACG ACA GAC GCC UGA UUA CCG UUG UAA CGA GAA GGU CAU TTT TTT TTT TTT TTT TV
AGC ACG ACA GAC GCC UGA UUA CGC UUC UUA ACA GAA CGG UAU TTT TTT TTT TTT TTT TV
AGC ACG ACA GAC GCC UGA UUU CCG UAA CUA GAG GAA GGA CUU TTT TTT TTT TTT TTT TV
AGC ACG ACA GAC GCC UGA UUA CCA GUC CAA UGU UGU AUG GCU TTT TTT TTT TTT TTT TV
AGC ACG ACA GAC GCC UGA UUA AGU CAA GCU UAC CUC UCA GGU TTT TTT TTT TTT TTT TV
AGC ACG ACA GAC GCC UGA UUC UGU CCA ACG ACU ACU AGG UGU TTT TTT TTT TTT TTT TV
AGC ACG ACA GAC GCC UGA UUU UUC GCA ACG GUU UAG UGU ACU TTT TTT TTT TTT TTT TV
AGC ACG ACA GAC GCC UGA UUU AAA GCU UUC CGU ACC AGU GGU TTT TTT TTT TTT TTT TV
AGC ACG ACA GAC GCC UGA UUC GUA CUC CUC AAA GAG UGG UCU TTT TTT TTT TTT TTT TV
AGC ACG ACA GAC GCC UGA UUG CCU ACU UUC CAA GGU CAG UCU TTT TTT TTT TTT TTT TV
AGC ACG ACA GAC GCC UGA UUA CCU CUG UUU CGU AAC GUG AGU TTT TTT TTT TTT TTT TV
AGC ACG ACA GAC GCC UGA UUC GAA AGU AAA UGA CGU UAC GCU TTT TTT TTT TTT TTT TV
AGC ACG ACA GAC GCC UGA UUC AAA GUG AAA UGA CAC GUU CGU TTT TTT TTT TTT TTT TV
AGC ACG ACA GAC GCC UGA UUG UUC GGA UGG ACA CCA GAG AUU TTT TTT TTT TTT TTT TV
AGC ACG ACA GAC GCC UGA UUG UUG UCA CAG ACU CCA AAG CUU TTT TTT TTT TTT TTT TV
AGC ACG ACA GAC GCC UGA UUG UUG UCA CAA GCC UAG UAC CCU TTT TTT TTT TTT TTT TV
AGC ACG ACA GAC GCC UGA UUG UCG UAA CUA GGU GUU CGC UAU TTT TTT TTT TTT TTT TV
AGC ACG ACA GAC GCC UGA UUG GGU AAC UCU UGG ACU CGU GAU TTT TTT TTT TTT TTT TV
AGC ACG ACA GAC GCC UGA UUA ACG GUU AGC CUU UGU UCU CAU TTT TTT TTT TTT TTT TV
AGC ACG ACA GAC GCC UGA UUA CCU UGG UGU UCU AUG ACG AGU TTT TTT TTT TTT TTT TV
AGC ACG ACA GAC GCC UGA UUA CGU UCU UUA CUU GCA UGG AGU TTT TTT TTT TTT TTT TV
AGC ACG ACA GAC GCC UGA UUA AAG CGU UUC GGU AGU CAC AUU TTT TTT TTT TTT TTT TV
AGC ACG ACA GAC GCC UGA UUA GAU GCG UUG GUC AAC UUG UCU TTT TTT TTT TTT TTT TV
AGC ACG ACA GAC GCC UGA UUC CUA GGU UGU AAA CUG UGC AGU TTT TTT TTT TTT TTT TV
AGC ACG ACA GAC GCC UGA UUC UAA GGG UUA AGA CAG UCA GCU TTT TTT TTT TTT TTT TV
AGC ACG ACA GAC GCC UGA UUA GUU AGC UUG UCG ACU UGA CCU TTT TTT TTT TTT TTT TV
AGC ACG ACA GAC GCC UGA UUC UUA GGG UUG GAA CUC ACG UGU TTT TTT TTT TTT TTT TV
AGC ACG ACA GAC GCC UGA UUA CUC AGA CUG AUG GUU AUG GCU TTT TTT TTT TTT TTT TV
AGC ACG ACA GAC GCC UGA UUA CUA CUG CUG AGU GUG UUG ACU TTT TTT TTT TTT TTT TV
AGC ACG ACA GAC GCC UGA UUA CUG CAA GCA UGA GUA GGU ACU TTT TTT TTT TTT TTT TV
AGC ACG ACA GAC GCC UGA UUA GGC UUG UGC UUU ACG UAC AUU TTT TTT TTT TTT TTT TV
AGC ACG ACA GAC GCC UGA UUG UAG CCU AGU UCC UUU ACA CGU TTT TTT TTT TTT TTT TV
AGC ACG ACA GAC GCC UGA UUG GAG UUC CUG AGU UAG UGA CCU TTT TTT TTT TTT TTT TV
AGC ACG ACA GAC GCC UGA UUC AUG GUG UUG CUU ACU UCG AAU TTT TTT TTT TTT TTT TV
AGC ACG ACA GAC GCC UGA UUG UGU CCA GUU UAC ACU UCC GAU TTT TTT TTT TTT TTT TV
AGC ACG ACA GAC GCC UGA UUA CCA AGU ACG GUU UGU GAG UCU TTT TTT TTT TTT TTT TV
AGC ACG ACA GAC GCC UGA UUC ACU GUC UCC UAU GCA GAA UGU TTT TTT TTT TTT TTT TV
AGC ACG ACA GAC GCC UGA UUC AGU UCU CAA UGU GCA UGG GUU TTT TTT TTT TTT TTT TV
AGC ACG ACA GAC GCC UGA UUC UGG UAG UUU AGU CCU GAC CAU TTT TTT TTT TTT TTT TV
AGC ACG ACA GAC GCC UGA UUC CCA AGU AAA GUU CUG GAA GCU TTT TTT TTT TTT TTT TV
AGC ACG ACA GAC GCC UGA UUG UCC UGA CGU UGG AGU UGA ACU TTT TTT TTT TTT TTT TV
AGC ACG ACA GAC GCC UGA UUC ACG AGU CGU AUG GUA GUA ACU TTT TTT TTT TTT TTT TV
AGC ACG ACA GAC GCC UGA UUC CUG AGU UAA GUG CAU GUC UGU TTT TTT TTT TTT TTT TV
AGC ACG ACA GAC GCC UGA UUG CUA CCC UUU CUA GGU UCA AGU TTT TTT TTT TTT TTT TV
AGC ACG ACA GAC GCC UGA UUA CUC GUC UCU UAA GGU AGG ACU TTT TTT TTT TTT TTT TV
AGC ACG ACA GAC GCC UGA UUG AUG CAA AGC UUC CCU AAC UGU TTT TTT TTT TTT TTT TV
AGC ACG ACA GAC GCC UGA UUG AAA CUU CUU CUA GCU AGA CGU TTT TTT TTT TTT TTT TV
AGC ACG ACA GAC GCC UGA UUA CGG UUC CAG AGG UGA CUA AAU TTT TTT TTT TTT TTT TV
AGC ACG ACA GAC GCC UGA UUU GAC GAA AGG UUC CUU CAC UGU TTT TTT TTT TTT TTT TV
AGC ACG ACA GAC GCC UGA UUA AAC UGU CUG AAA GGA AGC CUU TTT TTT TTT TTT TTT TV
AGC ACG ACA GAC GCC UGA UUA UGG UUC GAC UCA ACA ACC GUU TTT TTT TTT TTT TTT TV
AGC ACG ACA GAC GCC UGA UUC UGU UUA GCC AAC UCA GAG GUU TTT TTT TTT TTT TTT TV
AGC ACG ACA GAC GCC UGA UUA CGU CUU GGU CUU ACA ACU GCU TTT TTT TTT TTT TTT TV
AGC ACG ACA GAC GCC UGA UUU ACA AAG AAA CGG UAG CUC UCU TTT TTT TTT TTT TTT TV
AGC ACG ACA GAC GCC UGA UUC CUG UAA ACU UGG AGA ACC CUU TTT TTT TTT TTT TTT TV
AGC ACG ACA GAC GCC UGA UUU GAA GCU UGA ACA CAC UAA CGU TTT TTT TTT TTT TTT TV
AGC ACG ACA GAC GCC UGA UUG ACC UUU ACC UUU GCA GUG AGU TTT TTT TTT TTT TTT TV
AGC ACG ACA GAC GCC UGA UUG ACC UAA CAC CUU GUG AGC UCU TTT TTT TTT TTT TTT TV
AGC ACG ACA GAC GCC UGA UUG CAA ACU CCU UCA GUA GAC AGU TTT TTT TTT TTT TTT TV
AGC ACG ACA GAC GCC UGA UUC ACU AGU CAG UAA AGG AAG CUU TTT TTT TTT TTT TTT TV
AGC ACG ACA GAC GCC UGA UUG ACU UUA CUC AAG GGU AGC AGU TTT TTT TTT TTT TTT TV
AGC ACG ACA GAC GCC UGA UUA CUC UGU UCA AGG GAA UGA GCU TTT TTT TTT TTT TTT TV
AGC ACG ACA GAC GCC UGA UUC UAA GGG UUG UGC ACA GUC UCU TTT TTT TTT TTT TTT TV
AGC ACG ACA GAC GCC UGA UUU UUA GCA CUU GAG GUU AAC CGU TTT TTT TTT TTT TTT TV
AGC ACG ACA GAC GCC UGA UUG UCU CUA GCU UAC CCA AGG GUU TTT TTT TTT TTT TTT TV
AGC ACG ACA GAC GCC UGA UUG UCC AUG AGA ACG UGA GCA AUU TTT TTT TTT TTT TTT TV
AGC ACG ACA GAC GCC UGA UUU AAA CUG AUG GCU UCC UAG GGU TTT TTT TTT TTT TTT TV
AGC ACG ACA GAC GCC UGA UUU GAC CAG AAG GUU CAA ACG GUU TTT TTT TTT TTT TTT TV
AGC ACG ACA GAC GCC UGA UUU GGU CAA AGU UCU CCU UCG GAU TTT TTT TTT TTT TTT TV
AGC ACG ACA GAC GCC UGA UUA CUU GGU UGC UUC AGA CUC AAU TTT TTT TTT TTT TTT TV
AGC ACG ACA GAC GCC UGA UUA GGC AAU GUC ACU CUA AAC AGU TTT TTT TTT TTT TTT TV
AGC ACG ACA GAC GCC UGA UUA GCG UUG UAG CCU UAA CAG UAU TTT TTT TTT TTT TTT TV
AGC ACG ACA GAC GCC UGA UUC UGA GUA GUG AAC GAA CCG AUU TTT TTT TTT TTT TTT TV
AGC ACG ACA GAC GCC UGA UUG GAC UAC UAA GCC AAC CUU GGU TTT TTT TTT TTT TTT TV
AGC ACG ACA GAC GCC UGA UUC AAA UGG GAA AGU CUG UAG CCU TTT TTT TTT TTT TTT TV
AGC ACG ACA GAC GCC UGA UUU AAC AAG CAC ACG UGA GGU UCU TTT TTT TTT TTT TTT TV
AGC ACG ACA GAC GCC UGA UUC GUC AAA CAA GAG UGG AUG UCU TTT TTT TTT TTT TTT TV
AGC ACG ACA GAC GCC UGA UUC GUA AGG CAA AGG UGU GUA CCU TTT TTT TTT TTT TTT TV
AGC ACG ACA GAC GCC UGA UUG UCG UAU GUU ACU CCA ACU CGU TTT TTT TTT TTT TTT TV
AGC ACG ACA GAC GCC UGA UUC UAG GAU GUU ACC ACA ACC GUU TTT TTT TTT TTT TTT TV
AGC ACG ACA GAC GCC UGA UUA CCG UUU CUC CAG UCA AGG UCU TTT TTT TTT TTT TTT TV
AGC ACG ACA GAC GCC UGA UUC CAA UGA CAA UGG UAG UGA GCU TTT TTT TTT TTT TTT TV
AGC ACG ACA GAC GCC UGA UUG UUU ACC CUU CAC GUA ACG GAU TTT TTT TTT TTT TTT TV
AGC ACG ACA GAC GCC UGA UUU ACC UGA GUG UGC AGU CUG UAU TTT TTT TTT TTT TTT TV
AGC ACG ACA GAC GCC UGA UUU CGC AAG UUG GAC UAC GUA AAU TTT TTT TTT TTT TTT TV
AGC ACG ACA GAC GCC UGA UUA CUG CUU CAG GUA GUA AGG UCU TTT TTT TTT TTT TTT TV
AGC ACG ACA GAC GCC UGA UUC AGC UUG UCA GAG AAA CAA UGU TTT TTT TTT TTT TTT TV
AGC ACG ACA GAC GCC UGA UUG ACU UCU UGG CUA AAC UGC UGU TTT TTT TTT TTT TTT TV
AGC ACG ACA GAC GCC UGA UUC GUU AGA GAG AGU CCA AGG UCU TTT TTT TTT TTT TTT TV
AGC ACG ACA GAC GCC UGA UUG CUC UGA CUG GAA GAA AGU ACU TTT TTT TTT TTT TTT TV
AGC ACG ACA GAC GCC UGA UUC CGA UGA ACA AGG UUG UCU GAU TTT TTT TTT TTT TTT TV
AGC ACG ACA GAC GCC UGA UUC CCU AUG AAU GCA ACA GGU GAU TTT TTT TTT TTT TTT TV
AGC ACG ACA GAC GCC UGA UUA CUG UUG GUG UUC ACU GCA AAU TTT TTT TTT TTT TTT TV
AGC ACG ACA GAC GCC UGA UUA CUU GGU GUG UUA CUG CAG ACU TTT TTT TTT TTT TTT TV
AGC ACG ACA GAC GCC UGA UUC CUA AUG UGG AGA CUG AGA CAU TTT TTT TTT TTT TTT TV
AGC ACG ACA GAC GCC UGA UUC CGA AAU GCG AAA UGG UGU ACU TTT TTT TTT TTT TTT TV
AGC ACG ACA GAC GCC UGA UUG CCU ACU UCU AAA GUG GUA GCU TTT TTT TTT TTT TTT TV
AGC ACG ACA GAC GCC UGA UUA CUC CUG UGG UAA CCU UGU GAU TTT TTT TTT TTT TTT TV
AGC ACG ACA GAC GCC UGA UUC CCU UAG AAG UGU CCA UGG UGU TTT TTT TTT TTT TTT TV
AGC ACG ACA GAC GCC UGA UUU ACG CAA GAA ACU CUU UCA GGU TTT TTT TTT TTT TTT TV
AGC ACG ACA GAC GCC UGA UUC UGG AUG AGA UGA CAC GUC UCU TTT TTT TTT TTT TTT TV
AGC ACG ACA GAC GCC UGA UUG CUU UGA AGU UGU CUA CGC UAU TTT TTT TTT TTT TTT TV
AGC ACG ACA GAC GCC UGA UUU CAG CUA UGA ACG AGA GAA CUU TTT TTT TTT TTT TTT TV
AGC ACG ACA GAC GCC UGA UUC GCU UUA UGC AGA AGA CCA AUU TTT TTT TTT TTT TTT TV
AGC ACG ACA GAC GCC UGA UUA CAG GUA GAC UAC UCC UUC GAU TTT TTT TTT TTT TTT TV
AGC ACG ACA GAC GCC UGA UUG GGA ACU UUC CGU AGU CCU GAU TTT TTT TTT TTT TTT TV
AGC ACG ACA GAC GCC UGA UUG ACG UCU CAU GGA UGU UAC GGU TTT TTT TTT TTT TTT TV
AGC ACG ACA GAC GCC UGA UUG UAA ACG GUA CCU CUU UCG CAU TTT TTT TTT TTT TTT TV
AGC ACG ACA GAC GCC UGA UUG AGU CAC CAG UUG GAU GUG UCU TTT TTT TTT TTT TTT TV
AGC ACG ACA GAC GCC UGA UUG ACG UCU CUU GAA GGA UGG UCU TTT TTT TTT TTT TTT TV
AGC ACG ACA GAC GCC UGA UUG CAC UGU UUA GAC UUG AGA GCU TTT TTT TTT TTT TTT TV
AGC ACG ACA GAC GCC UGA UUC AGC UAC GAG UUU CUA CUU UGU TTT TTT TTT TTT TTT TV
AGC ACG ACA GAC GCC UGA UUA CCC UAG UGU UCA CAC UCU GGU TTT TTT TTT TTT TTT TV
AGC ACG ACA GAC GCC UGA UUA CCC UUG GAG UCU UCA UGA GGU TTT TTT TTT TTT TTT TV
AGC ACG ACA GAC GCC UGA UUC AAG GUG UAG UGU CCA CAG GUU TTT TTT TTT TTT TTT TV
AGC ACG ACA GAC GCC UGA UUC AGU GGA GAG AAC UCU GAA CUU TTT TTT TTT TTT TTT TV
AGC ACG ACA GAC GCC UGA UUC CAC UGU CAG UUG AAA GUA GCU TTT TTT TTT TTT TTT TV
AGC ACG ACA GAC GCC UGA UUU ACC GUU CAG UAG AAG AUG GCU TTT TTT TTT TTT TTT TV
AGC ACG ACA GAC GCC UGA UUA GCG UUC AAU GGA CUG AAA CAU TTT TTT TTT TTT TTT TV
AGC ACG ACA GAC GCC UGA UUC CUA AUG ACG UGA GAA GCA AUU TTT TTT TTT TTT TTT TV
AGC ACG ACA GAC GCC UGA UUU CGG AUG UUU CAG AGU UCC CAU TTT TTT TTT TTT TTT TV
AGC ACG ACA GAC GCC UGA UUA CUU GUG GUU UGA CUC UAC GAU TTT TTT TTT TTT TTT TV
AGC ACG ACA GAC GCC UGA UUG ACU GUU UCA CAC GAC ACC UGU TTT TTT TTT TTT TTT TV
AGC ACG ACA GAC GCC UGA UUG GAG UCG AAG GCU UAA UGA CCU TTT TTT TTT TTT TTT TV
AGC ACG ACA GAC GCC UGA UUC AUG GUU GCC UUC ACU UCA AGU TTT TTT TTT TTT TTT TV
AGC ACG ACA GAC GCC UGA UUU AAC CAG AGC ACU CCU AGU UGU TTT TTT TTT TTT TTT TV
AGC ACG ACA GAC GCC UGA UUG ACG ACU UGG AUG CUA UGG UCU TTT TTT TTT TTT TTT TV
AGC ACG ACA GAC GCC UGA UUA CUU GUA CAG GUG UUU CUC GAU TTT TTT TTT TTT TTT TV
AGC ACG ACA GAC GCC UGA UUA GUC CUU CUG CUU AAA GAC UGU TTT TTT TTT TTT TTT TV
AGC ACG ACA GAC GCC UGA UUA GAC CUU CUG UGU AGU UGA CGU TTT TTT TTT TTT TTT TV
AGC ACG ACA GAC GCC UGA UUA GAC CUA AUG CUG UUG UCG ACU TTT TTT TTT TTT TTT TV
AGC ACG ACA GAC GCC UGA UUU GCA AGG AAA GUU CUG ACC AAU TTT TTT TTT TTT TTT TV
AGC ACG ACA GAC GCC UGA UUG CAA CCU AAA CUU GAC CUA GGU TTT TTT TTT TTT TTT TV
AGC ACG ACA GAC GCC UGA UUC CUA GUG UGG AUG CAG AUG ACU TTT TTT TTT TTT TTT TV
AGC ACG ACA GAC GCC UGA UUC CAU GGU AUG GUU CAA GCG AUU TTT TTT TTT TTT TTT TV
AGC ACG ACA GAC GCC UGA UUA GCU UGU UCC UCA GUU CAG AUU TTT TTT TTT TTT TTT TV
AGC ACG ACA GAC GCC UGA UUC AAA UGU UCC UGA UGC UCA CGU TTT TTT TTT TTT TTT TV
AGC ACG ACA GAC GCC UGA UUC CUC AUG ACU GGA ACU AGG GAU TTT TTT TTT TTT TTT TV
AGC ACG ACA GAC GCC UGA UUU CUG GAC UAC AGG ACU AGG AGU TTT TTT TTT TTT TTT TV
AGC ACG ACA GAC GCC UGA UUA GGC UUU CAU GGA GUU GAC UCU TTT TTT TTT TTT TTT TV
AGC ACG ACA GAC GCC UGA UUC AGG UGU UCU CUG AGA CUA CCU TTT TTT TTT TTT TTT TV
AGC ACG ACA GAC GCC UGA UUA CGG UUC UUA UGU CCU ACA GCU TTT TTT TTT TTT TTT TV
AGC ACG ACA GAC GCC UGA UUA CAG CUC UGU UUC AGU UGG ACU TTT TTT TTT TTT TTT TV
AGC ACG ACA GAC GCC UGA UUC ACA CUG UCC UGU AGU UGC ACU TTT TTT TTT TTT TTT TV
AGC ACG ACA GAC GCC UGA UUG AAC GCU ACU UGU CUG UUU CAU TTT TTT TTT TTT TTT TV
AGC ACG ACA GAC GCC UGA UUU CCA AGG GAA AGC UAC AGU UUU TTT TTT TTT TTT TTT TV
AGC ACG ACA GAC GCC UGA UUG UAA ACU CAC UGC UCU ACG GAU TTT TTT TTT TTT TTT TV
AGC ACG ACA GAC GCC UGA UUC UUG AAG AGG AUG CAU GAA CCU TTT TTT TTT TTT TTT TV
AGC ACG ACA GAC GCC UGA UUC AUG CUU GAC UCC ACA AAG GUU TTT TTT TTT TTT TTT TV
AGC ACG ACA GAC GCC UGA UUA AAU GCU CUG CUC ACA AAG GUU TTT TTT TTT TTT TTT TV
AGC ACG ACA GAC GCC UGA UUG ACU GCU CUA AGG GAA ACA GUU TTT TTT TTT TTT TTT TV
AGC ACG ACA GAC GCC UGA UUC AGA GAU GUA ACU CCU ACA GCU TTT TTT TTT TTT TTT TV
AGC ACG ACA GAC GCC UGA UUA CAG AGU UCU GGA GUG UCC ACU TTT TTT TTT TTT TTT TV
AGC ACG ACA GAC GCC UGA UUA GUC UGU UCU GUC AGA UGA CGU TTT TTT TTT TTT TTT TV
AGC ACG ACA GAC GCC UGA UUA AGU GUC AUG CUU CGU UGG ACU TTT TTT TTT TTT TTT TV
AGC ACG ACA GAC GCC UGA UUG UAA CCC AAA GGC UUU AGG CUU TTT TTT TTT TTT TTT TV
AGC ACG ACA GAC GCC UGA UUG ACU CUU AGU CGU UUG AAC GGU TTT TTT TTT TTT TTT TV
AGC ACG ACA GAC GCC UGA UUU GGA AAC CAA AGG UGU UCC GAU TTT TTT TTT TTT TTT TV
AGC ACG ACA GAC GCC UGA UUU GAA GCC AAA CAU GAU GGU CAU TTT TTT TTT TTT TTT TV
AGC ACG ACA GAC GCC UGA UUU GAA CAA GAG AGC UCA UGG UCU TTT TTT TTT TTT TTT TV
AGC ACG ACA GAC GCC UGA UUG GAU GCU GUC ACU UCA CCU AGU TTT TTT TTT TTT TTT TV
AGC ACG ACA GAC GCC UGA UUU GCA GUC AGU CUC CUA ACU UGU TTT TTT TTT TTT TTT TV
AGC ACG ACA GAC GCC UGA UUU UAC UAG AAC UCG UGU GCU GAU TTT TTT TTT TTT TTT TV
AGC ACG ACA GAC GCC UGA UUG UAA CCC AAC CUA GGU GAC GUU TTT TTT TTT TTT TTT TV
AGC ACG ACA GAC GCC UGA UUU CCA UGG CUA AGA GAC AAG GUU TTT TTT TTT TTT TTT TV
AGC ACG ACA GAC GCC UGA UUG CUC UAG CAC AGU AAC AAG GUU TTT TTT TTT TTT TTT TV
AGC ACG ACA GAC GCC UGA UUC AGA AGU UGG AAG CAC UCU GUU TTT TTT TTT TTT TTT TV
AGC ACG ACA GAC GCC UGA UUG UAA CCC UAC UUC GUG AAC GAU TTT TTT TTT TTT TTT TV
AGC ACG ACA GAC GCC UGA UUU GGC AAC UAC GGA ACA UGU UUU TTT TTT TTT TTT TTT TV
AGC ACG ACA GAC GCC UGA UUC GAC AUG CUA UGU UGU GGU CAU TTT TTT TTT TTT TTT TV
AGC ACG ACA GAC GCC UGA UUA CCU GUC CAG AGU GUU UAU GCU TTT TTT TTT TTT TTT TV
AGC ACG ACA GAC GCC UGA UUA GAC UCU CGA UGG UUG UUA GCU TTT TTT TTT TTT TTT TV
AGC ACG ACA GAC GCC UGA UUA GAG UCU CGU GUG AGU UUC ACU TTT TTT TTT TTT TTT TV
AGC ACG ACA GAC GCC UGA UUC ACA GCU CAU GGG UUU GUU ACU TTT TTT TTT TTT TTT TV
AGC ACG ACA GAC GCC UGA UUC ACC UUG ACU GUG AUG UCG ACU TTT TTT TTT TTT TTT TV
AGC ACG ACA GAC GCC UGA UUC ACA AUG UGC AGA GAG AGU UCU TTT TTT TTT TTT TTT TV
AGC ACG ACA GAC GCC UGA UUU CAA AGA AAC CAU GUG UGC AGU TTT TTT TTT TTT TTT TV
AGC ACG ACA GAC GCC UGA UUC GGU ACU CUC AAA GUG CUU UAU TTT TTT TTT TTT TTT TV
AGC ACG ACA GAC GCC UGA UUC CAG UAG GUU AAA CAA GCG AUU TTT TTT TTT TTT TTT TV
AGC ACG ACA GAC GCC UGA UUU CUG GUA GCU UAA ACU CAA CGU TTT TTT TTT TTT TTT TV
AGC ACG ACA GAC GCC UGA UUC UCG AAG UCG UGU AGU GAA ACU TTT TTT TTT TTT TTT TV
AGC ACG ACA GAC GCC UGA UUU CAA AGG GAA GAC UGU CUC CAU TTT TTT TTT TTT TTT TV
AGC ACG ACA GAC GCC UGA UUC ACC UUG AAG UGC AGU GAA ACU TTT TTT TTT TTT TTT TV
AGC ACG ACA GAC GCC UGA UUC GUG UAG UAG AAC CAG ACU GGU TTT TTT TTT TTT TTT TV
AGC ACG ACA GAC GCC UGA UUC CUG ACU CUG AGA ACG AGA AUU TTT TTT TTT TTT TTT TV
AGC ACG ACA GAC GCC UGA UUA GCU UCU CAG GUG UUG GUA ACU TTT TTT TTT TTT TTT TV
AGC ACG ACA GAC GCC UGA UUG CCU ACU CCU UUG ACA GUA GUU TTT TTT TTT TTT TTT TV
AGC ACG ACA GAC GCC UGA UUC AGC UUG UAG GUC UUG GGA ACU TTT TTT TTT TTT TTT TV
AGC ACG ACA GAC GCC UGA UUA CCU GUU GCU GUU AGG CUA AAU TTT TTT TTT TTT TTT TV
AGC ACG ACA GAC GCC UGA UUA CGA CUU UGC AGA GAA CAG AUU TTT TTT TTT TTT TTT TV
AGC ACG ACA GAC GCC UGA UUC CUG AGU UUG AGA CAA GGA CUU TTT TTT TTT TTT TTT TV
AGC ACG ACA GAC GCC UGA UUA GUU GCU UCG ACA CAC AAG AUU TTT TTT TTT TTT TTT TV
AGC ACG ACA GAC GCC UGA UUA AAG UCU GUC UCC AGU UGC ACU TTT TTT TTT TTT TTT TV
AGC ACG ACA GAC GCC UGA UUA UGC UGU UCG AAC AAG ACA GUU TTT TTT TTT TTT TTT TV
AGC ACG ACA GAC GCC UGA UUU CCG AUG AAG CGA UGU ACA AAU TTT TTT TTT TTT TTT TV
AGC ACG ACA GAC GCC UGA UUA GGU CAG GUA CUC CUU CUG UAU TTT TTT TTT TTT TTT TV
AGC ACG ACA GAC GCC UGA UUG AAA CUG GUA CUU CUU UGC GAU TTT TTT TTT TTT TTT TV
AGC ACG ACA GAC GCC UGA UUG CUU CUA UGC AUG UCU ACC AGU TTT TTT TTT TTT TTT TV
AGC ACG ACA GAC GCC UGA UUG CCU UCA CAA CGG UAG UUC UCU TTT TTT TTT TTT TTT TV
AGC ACG ACA GAC GCC UGA UUC UGU UGA UGU GAC UCU CGA AAU TTT TTT TTT TTT TTT TV
AGC ACG ACA GAC GCC UGA UUU ACA AAG AGG UAG CCU UAC CGU TTT TTT TTT TTT TTT TV
AGC ACG ACA GAC GCC UGA UUG CCU UUA CUU UAG UAG CGU AGU TTT TTT TTT TTT TTT TV
AGC ACG ACA GAC GCC UGA UUC UGG UAG UUA ACG AAC UCA CGU TTT TTT TTT TTT TTT TV
AGC ACG ACA GAC GCC UGA UUC GGU AGU UGA AUG CUA GAC CAU TTT TTT TTT TTT TTT TV
AGC ACG ACA GAC GCC UGA UUC AGG UAG UCA GGU CUG AAA CAU TTT TTT TTT TTT TTT TV
AGC ACG ACA GAC GCC UGA UUA CCU GAG CAU GGG UUC UGU UAU TTT TTT TTT TTT TTT TV
AGC ACG ACA GAC GCC UGA UUC CAA AGU AAA GUG CAA CGU GUU TTT TTT TTT TTT TTT TV
AGC ACG ACA GAC GCC UGA UUA CUU GUU UGU GUA CGU CAG CAU TTT TTT TTT TTT TTT TV
AGC ACG ACA GAC GCC UGA UUU ACG GUU UAA CAG CAA CAG CUU TTT TTT TTT TTT TTT TV
AGC ACG ACA GAC GCC UGA UUU UCG GUA GCU ACC ACA ACA UGU TTT TTT TTT TTT TTT TV
AGC ACG ACA GAC GCC UGA UUC CGU UAU GCU ACC ACA GAG AUU TTT TTT TTT TTT TTT TV
AGC ACG ACA GAC GCC UGA UUA CUU UAG UAA CAC GAG AGC UCU TTT TTT TTT TTT TTT TV
AGC ACG ACA GAC GCC UGA UUU UAA GAC UGA CAA CCA AGG CUU TTT TTT TTT TTT TTT TV
AGC ACG ACA GAC GCC UGA UUC CUG AGU CAG AGU AGA GGU ACU TTT TTT TTT TTT TTT TV
AGC ACG ACA GAC GCC UGA UUG ACA GGU CAG AGU UGU AUG CCU TTT TTT TTT TTT TTT TV
AGC ACG ACA GAC GCC UGA UUG GCA AGU CAC UGG UUU ACU GGU TTT TTT TTT TTT TTT TV
AGC ACG ACA GAC GCC UGA UUU UAC CGU UGA ACC AAG GAG UCU TTT TTT TTT TTT TTT TV
AGC ACG ACA GAC GCC UGA UUU CAG UGU GCU ACC UAC CUA AGU TTT TTT TTT TTT TTT TV
AGC ACG ACA GAC GCC UGA UUC UAU GAA AUG UGC UCU GGA CUU TTT TTT TTT TTT TTT TV
AGC ACG ACA GAC GCC UGA UUC UGG UUA GGU GAC AUG UAG CCU TTT TTT TTT TTT TTT TV
AGC ACG ACA GAC GCC UGA UUC CGU UAG GAA AGU CAU GGA CAU TTT TTT TTT TTT TTT TV
AGC ACG ACA GAC GCC UGA UUC GUU UAU GUG GAA CCA UGU GCU TTT TTT TTT TTT TTT TV
AGC ACG ACA GAC GCC UGA UUC UUU GUA GUG UGC AAC AUG GCU TTT TTT TTT TTT TTT TV
AGC ACG ACA GAC GCC UGA UUG UAC CCU AAC UUU GGA UGC GUU TTT TTT TTT TTT TTT TV
AGC ACG ACA GAC GCC UGA UUC UCC UAG UAG ACU ACG AGU GGU TTT TTT TTT TTT TTT TV
AGC ACG ACA GAC GCC UGA UUC CUC UAG UGA GAC AAC ACA GUU TTT TTT TTT TTT TTT TV
AGC ACG ACA GAC GCC UGA UUG CCA UGU ACG AGU AGG AGU ACU TTT TTT TTT TTT TTT TV
AGC ACG ACA GAC GCC UGA UUG AUG CAC AAG CUU UCG UGU UAU TTT TTT TTT TTT TTT TV
AGC ACG ACA GAC GCC UGA UUG UGC AAG CAC AGU UCU AGA AAU TTT TTT TTT TTT TTT TV
AGC ACG ACA GAC GCC UGA UUC UCA CUG GUC AAA GGU ACA CCU TTT TTT TTT TTT TTT TV
AGC ACG ACA GAC GCC UGA UUU CUC GUA UGG CAA GAG GUA ACU TTT TTT TTT TTT TTT TV
AGC ACG ACA GAC GCC UGA UUU UUG CUA UGA GCA GAA CGU UCU TTT TTT TTT TTT TTT TV
AGC ACG ACA GAC GCC UGA UUC CUG UUA CAA UGA AGA AGC GUU TTT TTT TTT TTT TTT TV
AGC ACG ACA GAC GCC UGA UUC UAG UAG AGG AGU CGA GAC UCU TTT TTT TTT TTT TTT TV
AGC ACG ACA GAC GCC UGA UUC GAA AGU GAG GUU CUG UAC UCU TTT TTT TTT TTT TTT TV
AGC ACG ACA GAC GCC UGA UUC GUU AGU UGU GUC AGC AGU ACU TTT TTT TTT TTT TTT TV
AGC ACG ACA GAC GCC UGA UUA CUG UCU GAC UAC CAA AGG CUU TTT TTT TTT TTT TTT TV
AGC ACG ACA GAC GCC UGA UUC AAA GUU GUU CUG AGU AGC CUU TTT TTT TTT TTT TTT TV
AGC ACG ACA GAC GCC UGA UUC CUG AUG CUU GAG UGA GGU ACU TTT TTT TTT TTT TTT TV
AGC ACG ACA GAC GCC UGA UUG CAC UAG CAC ACU GAG ACU AUU TTT TTT TTT TTT TTT TV
AGC ACG ACA GAC GCC UGA UUC CCU UAG UGC AGA AAG UGG ACU TTT TTT TTT TTT TTT TV
AGC ACG ACA GAC GCC UGA UUC UUU GAU GUU UGC AAG CAC UGU TTT TTT TTT TTT TTT TV
AGC ACG ACA GAC GCC UGA UUC CUG UAC UCA GAG AGA CAA GUU TTT TTT TTT TTT TTT TV
AGC ACG ACA GAC GCC UGA UUC UCU GAC ACU UGU GGA GAA CUU TTT TTT TTT TTT TTT TV
AGC ACG ACA GAC GCC UGA UUU CAC GUU CUG AGU GUG AAG ACU TTT TTT TTT TTT TTT TV
AGC ACG ACA GAC GCC UGA UUU UUA GUC UAC GCA ACU UCG GAU TTT TTT TTT TTT TTT TV
AGC ACG ACA GAC GCC UGA UUC GAG ACU GUG UAC GAU GUU UCU TTT TTT TTT TTT TTT TV
AGC ACG ACA GAC GCC UGA UUC AUG CUG ACA GGU GAU GGU UCU TTT TTT TTT TTT TTT TV
AGC ACG ACA GAC GCC UGA UUC ACC AUG CUU UAG GUA UGU CGU TTT TTT TTT TTT TTT TV
AGC ACG ACA GAC GCC UGA UUC UAG UGG AAA GUG CUG UGA CCU TTT TTT TTT TTT TTT TV
AGC ACG ACA GAC GCC UGA UUU UUA GGC AAA CGU GUA ACU CGU TTT TTT TTT TTT TTT TV
AGC ACG ACA GAC GCC UGA UUC UAU GUG AGA GAC UAG CGU ACU TTT TTT TTT TTT TTT TV
AGC ACG ACA GAC GCC UGA UUC GGU AAG UAU GGU CAG ACA CUU TTT TTT TTT TTT TTT TV
AGC ACG ACA GAC GCC UGA UUC UAU GUC CUU GGU AUG GAA CGU TTT TTT TTT TTT TTT TV
AGC ACG ACA GAC GCC UGA UUC UUA GUA GGA AGU CGA AGU CCU TTT TTT TTT TTT TTT TV
AGC ACG ACA GAC GCC UGA UUC GUG AGA GGU UUA CAA CGU CAU TTT TTT TTT TTT TTT TV
AGC ACG ACA GAC GCC UGA UUC GAA GGU UGU UUA CAC AGU GCU TTT TTT TTT TTT TTT TV
AGC ACG ACA GAC GCC UGA UUU CUC GAG AGU UUC UCU ACA UGU TTT TTT TTT TTT TTT TV
AGC ACG ACA GAC GCC UGA UUC CUA AGA CUA UGA GGA AGC UGU TTT TTT TTT TTT TTT TV
AGC ACG ACA GAC GCC UGA UUC CGU AUG ACU GUG UGU AGG ACU TTT TTT TTT TTT TTT TV
AGC ACG ACA GAC GCC UGA UUG CAC AGU UCG GAU GUA UGG ACU TTT TTT TTT TTT TTT TV
AGC ACG ACA GAC GCC UGA UUG CAC AUG CUA AGU GGA AGU UCU TTT TTT TTT TTT TTT TV
AGC ACG ACA GAC GCC UGA UUU UGC GUA CGU GAU GUA GAA CCU TTT TTT TTT TTT TTT TV
AGC ACG ACA GAC GCC UGA UUU UCU GUA CGA AGG UAG CAC UCU TTT TTT TTT TTT TTT TV
AGC ACG ACA GAC GCC UGA UUA UGC GUU CCU UCA GGA CUU AUU TTT TTT TTT TTT TTT TV
AGC ACG ACA GAC GCC UGA UUU UGU CAA AGG UCU CGU UGC ACU TTT TTT TTT TTT TTT TV
AGC ACG ACA GAC GCC UGA UUU CGA AAG GGU UUC AAC AGU GCU TTT TTT TTT TTT TTT TV
AGC ACG ACA GAC GCC UGA UUG UUU ACC CAA AGG UGA CGA GUU TTT TTT TTT TTT TTT TV
AGC ACG ACA GAC GCC UGA UUC UGU CUA UGA CCA AGA AGG CUU TTT TTT TTT TTT TTT TV
AGC ACG ACA GAC GCC UGA UUG CUA CCA ACA AAG UAC CGU UGU TTT TTT TTT TTT TTT TV
AGC ACG ACA GAC GCC UGA UUC CAG UUC GUA ACA CCA GAA UGU TTT TTT TTT TTT TTT TV
AGC ACG ACA GAC GCC UGA UUG CUC UGA CAU GGA UGG UUU CAU TTT TTT TTT TTT TTT TV
AGC ACG ACA GAC GCC UGA UUU GCA CAC CAC AAU GGU CAG UUU TTT TTT TTT TTT TTT TV
